1 **SCLC\_CellMiner: Integrated Genomics and Therapeutics Predictors of Small Cell Lung**  
2 **Cancer Cell Lines based on their genomic signatures**

3  
4 Camille Tlemsani<sup>1,†,\*</sup>, Lorinc Pongor<sup>1,†</sup>, Luc Girard<sup>4</sup>, Nitin Roper<sup>1</sup>, Fathi Elloumi<sup>1</sup>, Sudhir  
5 Varma<sup>1</sup>, Augustin Luna<sup>5</sup>, Vinodh N. Rajapakse<sup>1</sup>, Robin Sebastian<sup>1</sup>, Kurt W. Kohn<sup>1</sup>, Julia  
6 Krushkal<sup>2</sup>, Mirit Aladjem<sup>1</sup>, Beverly A. Teicher<sup>2</sup>, Paul S. Meltzer<sup>3</sup>, William C. Reinhold<sup>1</sup>, John D.  
7 Minna<sup>4</sup>, Anish Thomas<sup>1</sup> and Yves Pommier<sup>1, 6</sup>

8  
9 <sup>1</sup> Developmental Therapeutics Branch and Laboratory of Molecular Pharmacology, Center for  
10 Cancer Research, National Cancer Institute, NIH, Bethesda, MD 20892, USA

11  
12 <sup>2</sup> Biometric Research Program, Division of Cancer Treatment and Diagnosis, National Cancer  
13 Institute, NIH, 9609 Medical Center Dr., Rockville, MD 20850, USA

14  
15 <sup>3</sup> Genetics Branch, Center for Cancer Research, National Cancer Institute, Bethesda, MD 20892,  
16 USA

17  
18 <sup>4</sup> Hamon Center for Therapeutic Oncology Research, UT Southwestern Medical Center, Dallas,  
19 TX 75390, USA

20  
21 <sup>5</sup> cBio Center, Division of Biostatistics, Department of Data Sciences, Dana-Farber Cancer  
22 Institute, Boston, MA 02115, USA

23  
24 <sup>6</sup> To whom correspondence should be addressed:  
25 [pommier@nih.gov](mailto:pommier@nih.gov)

26  
27 \* present address, INSERM U1016, Cochin Institute, Paris Descartes University, 75014 Paris

28  
29 † Contributed equally to the study

30  
31  
32

33 **Summary**

34 Model systems are necessary to understand the biology of SCLC and develop new therapies against  
35 this recalcitrant disease. Here we provide the first online resource, CellMiner-SCLC  
36 (<https://discover.nci.nih.gov/SclcCellMinerCDB>) incorporating 118 individual SCLC cell lines  
37 and extensive omics and drug sensitivity datasets, including high resolution methylome performed  
38 for the purpose of the current study. We demonstrate the reproducibility of the cell lines and  
39 genomic data across the CCLE, GDSC, CTRP, NCI and UTSW datasets. We validate the SCLC  
40 classification based on four master transcription factors: NEUROD1, ASCL1, POU2F3 and YAP1  
41 (NAPY classification) and show transcription networks connecting each them with their  
42 downstream and upstream regulators as well as with the NOTCH and HIPPO pathways and the  
43 MYC genes (MYC, MYCL1 and MYCN). We find that each of the 4 subsets express specific  
44 surface markers for antibody-targeted therapies. The SCLC-Y cell lines differ from the other  
45 subsets by expressing the NOTCH pathway and the antigen-presenting machinery (APM), and  
46 responding to mTOR and AKT inhibitors. Our analyses suggest the potential value of NOTCH  
47 activators, YAP1 inhibitors and immune checkpoint inhibitors in SCLC-Y tumors that can now be  
48 independently validated.

49  
50 **Keywords**

51 Small cell lung cancer, transcriptome, DNA methylation, epigenetic, drug response, YAP1,  
52 immunotherapy, neuroendocrine tumors

53

54  
55

## Graphical Abstract

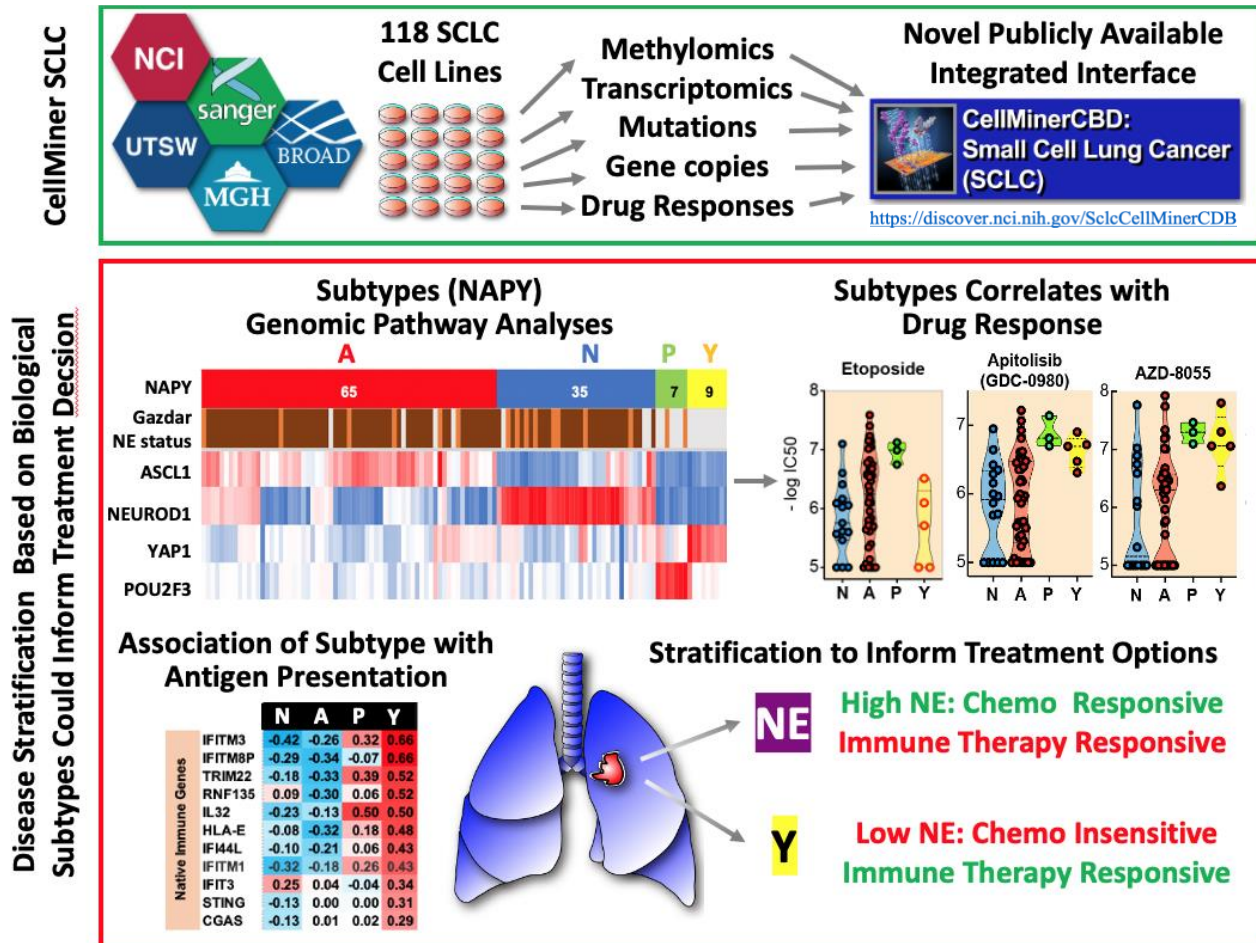

56  
57

## 58 Highlights

- 59 • SCLC-CellMiner provides the most extensive SCLC resource in terms of number of cell lines  
60 (118 cell lines), extensive omics data (exome, microarray, RNA-seq, copy number,  
61 methylomes and microRNA) and drug sensitivity testing.
- 62 • We find evidence of distinct epigenetic profile of SCLC cell lines (global hypomethylation  
63 and histone gene methylation), which is consistent with their plasticity.
- 64 • Transcriptome analyses demonstrate the coherent transcriptional networks associated with the  
65 4 main genomic subgroups (NEUROD1, ASCL1, POU2F3 & YAP1 = NAPY classification)  
66 and their connection with the NOTCH and HIPPO signaling pathways.
- 67 • SCLC-CellMiner provides a conceptual framework for the selection of therapies for SCLC in  
68 a personalized fashion allowing putative biomarkers according molecular classifications and  
69 molecular characteristics.
- 70 • SCLC-Y cell lines differ from the other cancer cell lines; their transcriptome resemble  
71 NSCLC cell lines. YAP1 cell lines while being the most resistant to standard of care  
72 treatments (etoposide, cisplatin and topotecan) respond to mTOR and AKT inhibitors and  
73 present native immune predisposition suggesting sensitivity to immune checkpoint inhibitors.

## 74 Introduction

75 Lung cancer is the leading cause of cancer death worldwide. Although small cell lung cancer  
76 (SCLC) represents only 15% of all lung cancers, it accounts for more than 30,000 cases in the US  
77 alone and has the most aggressive clinical course with most patients presenting with widely  
78 metastatic disease and a median survival of 10-12 months (Wang et al., 2017). The diagnosis of  
79 SCLC is based on histological features including dense sheets of small cells with scant cytoplasm,  
80 ill-defined borders and nuclei with finely granular chromatin lacking prominent nucleoli (Gazdar  
81 et al., 2017; Hann et al., 2019; Rudin et al., 2019). Immunohistochemistry shows high Ki-67,  
82 consistent with rapid cellular proliferation generally driven by high MYC oncogenic expression  
83 together with tumor suppressor RB1 and TP53 inactivation (Gazdar et al., 2017). Unlike the  
84 increasingly personalized treatment approaches for non-small cell lung cancer (NSCLC), SCLC is  
85 currently treated as a homogeneous disease (Hann et al., 2019; Rudin et al., 2019; Thomas and  
86 Pommier, 2016). The typical low life expectancy for a patient diagnosed with SCLC and the  
87 options for therapy (platinum-etoposide combination as first line therapy and topotecan at relapse)  
88 remain limited, causing the National Cancer Institute (NCI) to categorize SCLC as a “recalcitrant”  
89 cancer.

90 Most SCLC tumors are characterized by their neuroendocrine differentiation, which can be  
91 histologically visualized using a panel of markers including synaptophysin (SYP), chromogranin  
92 A (CHGA), NCAM1 and insulinoma-associated protein 1 (INSM1) (Gazdar et al., 2017; Hann et  
93 al., 2019; McColl et al., 2017). Yet, a smaller subset of SCLC is negative for the standard  
94 neuroendocrine markers (Gazdar et al., 2017; Guinee et al., 1994; Hann et al., 2019; McColl et al.,  
95 2017). Hence, SCLCs have been historically defined as “classic” (neuroendocrine: NE) or “variant”  
96 (non-neuroendocrine: non-NE) (Gazdar et al., 2017; Gazdar et al., 1985; Rudin et al., 2019).  
97 Ongoing efforts are designed to categorize the molecular subtypes of SCLCs (Gazdar et al., 2017;  
98 George et al., 2015; McColl et al., 2017; Rudin et al., 2019) and to rationalize novel therapeutic  
99 approaches based on molecular genomic characteristics of the disease (Gardner et al., 2017;  
100 McColl et al., 2017; Thomas and Pommier, 2016).

101 To discriminate NE and non-NE SCLC, Gazdar *et al.*, proposed a classification based on  
102 the expression of 50 genes including *ASCL1* (achaete-scute homolog 1) and *NEUROD1*  
103 (neurogenic differentiation factor 1), which are key transcription factors binding to E-box-  
104 containing promoter consensus core sequences 5'-CANNTG. *ASCL1* and *NEUROD1* drive the  
105 maturation of neuroendocrine cells of the lung (Borges et al., 1997; Ito et al., 2000; Neptune et al.,  
106 2008) and are highly expressed in NE SCLCs (Zhang et al., 2018). A consensus nomenclature for  
107 four molecular subtypes has been recently proposed based on differential expression of two  
108 additional transcription factors, *YAP1* (Yes-Associated Protein 1) and *POU2F3* (POU class 2  
109 homeodomain box 3) for the non-NE SCLC subtype (Rudin et al., 2019). *POU2F3* encodes a  
110 member of the POU domain family of transcription factors normally expressed in rare  
111 chemosensory cells of the normal lung epithelium (tuft cells) and of the gastrointestinal track  
112 (Huang et al., 2018). Selective expression of *POU2F3* was identified recently by CRISPR screening  
113 in a subset of SCLC cells that lack NE features (Huang et al., 2018). *YAP1*, a key mediator of the  
114 Hippo signaling pathway, was discovered as being reciprocally expressed relative to the  
115 neuroendocrine transcription factor *INSM1* (McColl et al., 2017). Hence, it has now been proposed  
116 to classify SCLCs into 4 groups based on the expression of *NEUROD1*, *ASCL1*, *POU2F3* and  
117 *YAP1* (Rudin et al., 2019). For short, we will refer to this classification as “NAPY”  
118 ((N=*NEUROD1*, A=*ASCL1*, P=*POU2F3* and Y= *YAP1*) in the present study.

119 Genomic initiatives have accelerated the pace of discovery for many cancers (Cancer  
120 Genome Atlas Research, 2012, 2014). Unfortunately, the TCGA was not extended to SCLC  
121 because of a lack of readily accessible and adequate tumor tissue, as most patients are diagnosed  
122 with SCLC by fine-needle aspiration, while surgically resected specimens are relatively rare.  
123 Further underscoring this issue, comprehensive genomic and transcriptomic data is available only  
124 for less than 250 SCLC tumors to date. Nevertheless, SCLC research has benefited from the  
125 systematic collection of a large number of tumor cell lines; most of them developed at the US  
126 National Cancer Institute (NCI) in the NCI-VA/NCI-Navy Medical Oncology Branches (Carney  
127 et al., 1985; Gazdar et al., 1985). This collection has been distributed widely, and detailed genetic  
128 and pharmacological annotation available from several groups including the NCI, the Broad-MIT  
129 and the Sanger/MGH (Barretina et al., 2012; Garnett et al., 2012; Polley et al., 2016). Yet, in spite  
130 of large number of cell lines and drugs profiled (Figure 1), the data are accessible only from  
131 different platforms making it challenging to systematically translate and integrate genomic data  
132 into knowledge of SCLC tumor biology and therapeutic possibilities. Additionally, a number of  
133 SCLC cell lines generated by the Minna-Gazdar group at UT Southwestern Medical Center  
134 (McMillan et al., 2018) had not been integrated in the preexisting NCI, Broad Institute  
135 (CCLE/CTRP) and Sanger-Massachusetts General Hospital (GDSC) databases.

136 To substantially extend our understanding of the genomic features of SCLC, we performed  
137 genome-wide DNA methylation at single-base resolution by Illumina Methylation 850k analysis  
138 on the NCI set of 68 SCLC cell lines and whole genome RNA-seq for 72 cell lines of the UTSW  
139 set. We also integrated these data in a global drug and genomic database (SCLC\_Global)  
140 encompassing a total of 118 individual SCLC cell lines. This enabled us to enrich for the least  
141 represented SCLC subtypes, which are the non-NE YAP1 and POU2F3 subtypes and to further  
142 analyze the genomic and drug response characteristics of the YAP1 subgroup compared to the  
143 classical neuroendocrine NEUROD1 and ASCL1 subtypes of SCLC. The integrated data are  
144 available from the web-based tool, which we refer to as SCLC-CellMinerCDB  
145 (<https://discover.nci.nih.gov/ScLcCellMinerCDB/>).

146

## 147 **Results**

148

### 149 **SCLC-CellMinerCDB Resource**

150 SCLC-CellMinerCDB integrates genomic and drug activity data for total of 118 molecularly  
151 characterized SCLC cell lines (Figure 1) including 68 from the NCI (Polley et al., 2016), 74 from  
152 the GDSC (Garnett et al., 2012), 53 from the CCLE, 39 from the CTRP (Barretina et al., 2012) and  
153 73 from UT Southwestern (UTSW) (Gazdar et al., 2010). Details for each cell line (source of the  
154 cell lines with patient characteristics and main genomic features and classification) is provided in  
155 Supplemental Table S1. Among those 118 SCLC cell lines, 17 (14%) are in all five data sources,  
156 20 (17%) are in four data sources, 23 (20%) in three data sources, 15 (13%) in two data sources  
157 while 43 (36%) are present in only one data source (Figure 1A and Supplemental Table S2).

158 Our integrated resource includes new data obtained by performing high resolution whole  
159 genome methylome and copy number analyses for 66 cell lines as well as whole genome-level  
160 transcriptome by RNA-seq for 72 cell lines. Data first made available here are highlighted with  
161 yellow background in Figure 1B. SCLC-CellMinerCDB also makes accessible whole exome  
162 mutation data for 12,537 genes across 72 cell lines of the UTSW SCLC database in addition to the

163 previously released whole exome sequencing data for 52 cell lines from CCLE and 62 cell lines  
164 from GSDC.

165 The range of tested clinical drugs and investigational compounds in each dataset and across  
166 data sources is summarized in Figure 1D. The NCI database provides the largest number of tested  
167 compounds (N = 526), followed by the CTRP (N = 481), GDSC (N = 297) and CCLE (N = 224).  
168 The overlap between tested compound across the data sources is also shown in Figure 1D.

169 SCLC\_CellMiner allows multiple analyses listed in Table 1. They include confirming cell  
170 line consistency and identity across datasets, drug activity reproducibility across datasets,  
171 determinants of gene expression (based on DNA copy number, promoter methylation and  
172 microRNA expression), exploration and validation of genomic networks, classification of the cell  
173 lines based on metadata such as the NAPY, epithelial mesenchymal (EMT) and antigen presenting  
174 machinery (APM) scores and the validation and discovery of drug response determinants.

### 175 176 **Data Validation, Cross-Database (CDB) Analyses and CellMinerCDB Univariate Analyses**

177 Cross comparison for matched cell lines between databases was used to validate the new NCI-  
178 SCLC methylome (850K Illumina array) by comparison with the published SCLC data of GDSC  
179 (450K array) (Rajapakse et al., 2018). The comparison yielded remarkably high overall correlation  
180 with a median of 0.92 for 7,246 common genes with wide expression range for the 43 common  
181 cell lines (Figure 2A). Cross-correlation of the new RNA-seq data from UTSW with other gene  
182 expression data (microarray and RNA-seq) were also highly significant albeit with lower median  
183 correlations (Figure 2A). These data demonstrate the high reproducibility of the new data (NCI  
184 methylome and UTSW RNA-seq) (McMillan et al., 2018) across independent databases and the  
185 similarity of cell lines grown at different institutions and analyzed independently with different  
186 technical platforms (RNA-seq vs microarray, 850k vs 450k methylome arrays).

187 Measurement reproducibility across pharmacogenomic datasets can instantly be  
188 performed and displayed using CellMinerCDB (<https://discover.nci.nih.gov/ScLcCellMinerCDB/>)  
189 by plotting the same gene (expression, copy number or methylation), drug or microRNA on the  
190 x-Axis and the y-Axis. Expression of *Schlafen 11* (*SLFN11*), a gene whose expression is highly  
191 predictive of cytotoxic response to a broad range of DNA targeted agents including frontline  
192 treatments of SCLC (etoposide, topotecan, cis- and carboplatin) as well as drugs under  
193 investigation such as the poly(ADP-ribose polymerase) inhibitors (olaparib, niraparib, rucaparib,  
194 talazoparib) (Barretina et al., 2012; Farago et al., 2019; Gardner et al., 2017; Murai et al., 2019;  
195 Reinhold et al., 2017a; Zoppoli et al., 2012) measured by RNA-seq in the UTSW database shows  
196 a 0.92 Pearson's correlation with its measured values by Affymetrix microarray in the NCI  
197 database (Figure 2B). *SLFN11* promoter DNA methylation measured by high resolution Illumina  
198 850k arrays in the NCI database also shows a 0.9 Pearson's correlation with its measured values  
199 by Illumina 450k microarray in the GDSC database (Figure 2C).

200 The other examples of cross-database analyses in Figure 2 are for *MYC*, which is commonly  
201 amplified and drives proliferation of a large fraction of SCLC (Dammert et al., 2019; Gazdar et al.,  
202 2017), *BCL2*, which encodes a canonical antiapoptotic protein targeted by Navitoclax (ABT-263)  
203 (Rudin et al., 2012) and for two SCLC drugs etoposide and topotecan. *MYC* amplification (by 850k  
204 methylome array in NCI) is correlated with its overexpression (by RNA-seq in CCLE) (Figure 2D).  
205 The activity of navitoclax is correlated with *BCL2* expression, suggesting *BCL2* addiction for the  
206 cells overexpressing *BCL2*. Drug activity data for etoposide are correlated in the NCI and CTRP

207 databases (note that drug activity was measured by different assays in each database; Rajapakse et  
208 al. (2018)). The cells most sensitive or resistant to etoposide overlap for topotecan.

209 Integrating the broader CellMinerCDB database (<http://discover.nci.nih.gov/cellminerfdb>)  
210 of over 1000 cell lines including 74 and 53 SCLC cell lines in GDSC and CCLE (see Figure 1A)  
211 allows comparison between tissue of origin using CellMinerCDB (Rajapakse et al., 2018). For  
212 instance, the expression of *MYC* is correlated with the replication processivity factor *PCNA*  
213 (Proliferating Cell Nuclear Antigen) in SCLC (green) vs. other tissues including NSCLC (red),  
214 consistent with the replicative genotype of SCLC based on their high *PCNA* expression (alike  
215 leukemia and lymphoma cell lines) compared to NSCLC. Yet, high *MYC* expression is a feature of  
216 both the SCLC and NSCLC cell lines.

217

## 218 **SCLC Methylome**

219 Two prior studies described the DNA methylation profiles of SCLC with limited data for  
220 established cell lines; 18 cell lines were examined by Kalari et al. (2013) and 7 by Poirier et al.  
221 (2015) together with primary tumors and PDX samples. Here we determined the methylome of the  
222 66 cell lines of the NCI and processed the methylome data for the whole 985 GDSC cancer cell  
223 line dataset including its 61 SCLC cell lines. The data are highly reproducible in the two datasets  
224 for the 43 common cell lines (see Figure 2A and 2C). Thus, the SCLC-CellMiner resource provides  
225 the largest promoter methylation database for a total of 84 individual SCLC cell lines (43 common  
226 + 23 specific to NCI-SCLC + 18 specific to GDSC).

### 227 *Globally low methylation levels of SCLC cell lines*

228 Global methylation levels showed marked differences between the SCLC cell lines and the other  
229 cancer cell lines from different histologies. The median level of global methylation of the SCLC  
230 cell lines is the lowest compared with 21 subtypes of cancers (Figures 3A-B), which may reflect  
231 their intrinsic plasticity and stemness.

232 Yet, expression of some key SCLC genes is driven by promoter methylation, such as *ASCL1*  
233 and *NEUROD1* (Supplemental Figure S1). Cells not expressing those genes tend to be  
234 overmethylated. Conversely, cells expressing *ASCL1*, *NEUROD1*, *YAP1* and *POU2F3* have no  
235 significant promoter methylation. Yet, hypermethylation is not detectable in a number of cell lines  
236 that do not express those genes implying that further studies are warranted to examine other  
237 epigenetic markers (likely histone marks) as regulators of SCLC gene expression.

238

### 239 *SCLC cell lines have a distinct methylome*

240 To determine the methylation signature of the SCLC cell lines and differences with other cancer  
241 types, we compared the DNA methylation profiles of the NCI-SCLC to the methylation profiles of  
242 the NCI-60 (which includes 7 tissues of origin with 6 NSCLC cell lines but no SCLC cell lines)  
243 and of 75 NSCLC cell lines of the GDSC. After selecting a total of 2,016 genes with the most  
244 variable methylation (standard deviation > 0.25), we performed hierarchical clustering (Figure 3C).  
245 All the SCLC cell lines segregated together, while the NSCLC cell lines (N = 83 from GDSC and  
246 NCI-60) formed 4 clusters interrupted by SCLC cell lines (Figure 3C). The 2,016 genes clustered  
247 into three main groups: i) genes hypomethylated in SCLC cell lines (clusters 1,2 and 4), ii) genes  
248 hypermethylated in SCLC cell lines (cluster 5), and iii) genes with high methylation range in all  
249 cell lines independent of their tissue of origin (cluster 3). The detailed list of the genes in each  
250 cluster is provided in Supplemental Table S3.

251 Pathway analysis of the 1,030 specifically hypomethylated genes (clusters 1 + 2) shows an  
252 enrichment of neurological as well as extracellular matrix (ECM) pathways (Figure 3D and  
253 Supplemental Table 3), consistent with the neuroendocrine and cell aggregation features of the  
254 classic SCLC cell lines (Gazdar et al., 2017). Among these neuroendocrine (NE) genes, figure  
255 *ASCLI*, *CHGA* and *INSM1*, which is consistent with their expression. Many genes involved in  
256 epithelial–mesenchymal transition (EMT) (Kohn et al., 2014) also tend to be hypomethylated in  
257 the SCLC cell lines including *CLDN7*, *ESRP2*, *MARVELD2*, *PRSS8*, *ST14*, *IRF6*, *GRHL2*, *CLDN4*,  
258 *EHF*, *ADAPI* and *CMTM3*. Most of the EMT genes belong to cluster 4 and are also  
259 hypomethylated in the NSCLC cell lines.

260 Analysis of the 238 genes selectively hypermethylated in SCLC (cluster 5) shows a  
261 significant representation of the beta-catenin/Tcf transaction and Wnt signaling pathway as well as  
262 genes involved in lipid metabolism by peroxisome proliferation-activated receptor alpha (PPAR $\alpha$ )  
263 (Figure 3E). *YAP1* and *ERBB2* are also hypermethylated in most cell lines, as well as a large  
264 fraction of the canonical histone genes.

### 265 *Expression of histone and epithelial genes is highly driven by methylation in SCLC cell lines*

266 To further determine gene categories driven by promoter methylation, we compared the gene  
267 expression and methylation pattern of functional groups (Reinhold et al. (2017c); Supplemental  
268 Table S4). Two functional gene categories showed strong correlation between methylation and  
269 expression: epithelial and histone genes (Figure 3F), with 25 and 75 genes, respectively. The  
270 median correlation was - 0.53 for the epithelial genes and - 0.50 for the histone genes.

271 Analysis of individual genes (Figure 3G) confirmed that histone genes are dominantly  
272 regulated by methylation in SCLC. Among the 62 canonical histone genes with available data, 21  
273 belong to H2A core histone family, 18 to H2B core histone family, 14 to H3 core histone family,  
274 13 to H4 core histone family and 9 to the H1 linker family. Among the 13 non-canonical histones,  
275 4 are replication independent histones (*H1FO*, *H1FNT*, *H1FOO*, *H1FX*) and replacements of H1  
276 histone. Their transcription is independent of DNA replication and they are expressed throughout  
277 the cell cycle in a tissue specific manner. The remaining are variants from core histones (*H2AFJ*,  
278 *H2AFX*, *H2AFY2*, *H2AFY*, *H3F3C*, *H3F3B*, *H2AFV*, *H2AFZ*). Unlike canonical histones that  
279 function primarily in genome packaging and gene regulation, variant histones distinct function  
280 including DNA repair, meiotic recombination and chromosome segregation (Buschbeck and Hake,  
281 2017). Canonical histones showed the highest correlation between expression and methylation  
282 suggesting that epigenetic regulation of canonical histone is a feature of SCLC carcinogenesis. On  
283 the contrary, we find that the expression of the non-canonical histones is inconsistently driven by  
284 methylation suggesting a higher dynamic state across the SCLC cell lines.

285 Detailed analysis of the macroH21 variant *H2AFY* using the RNA-seq data from the UTSW  
286 database revealed that SCLC cell lines predominantly express the macroH2A1.2 variant compared  
287 to the macroH2A1.1 variant. The macroH2A1.2 splice variant is known to promote homologous  
288 recombination and is essential for proliferation (Kim et al., 2018). This finding is consistent with  
289 the characteristically high proliferation of SCLC cell lines, which is regulated by methylation and  
290 epigenetics in addition to *RBI* and *TP53* inactivation and *MYC* oncogene overexpression.

### 291 **SCLC DNA Copy Number vs Methylome as Drivers of Gene Expression**

292 To determine how gene copy number and promoter methylation account for gene expression in the  
293 SCLC cell lines, we analyzed whole-genome DNA copy number data and correlated the expression  
294



295 of each gene with DNA copy number (x-axis) and methylation (y-axis) (Figure 3G) (Reinhold et  
296 al., 2017c). 84% of the genes showed positive correlation with copy number and 65% negative  
297 correlation with DNA methylation. Consistent with the pathway analyses (Figure 3F), epithelial  
298 (green) and histone genes (red) were most consistently driven by promoter methylation.  
299 Correlations for individual genes between methylation and expression can be readily checked  
300 using SCLC-CellMiner (<https://discover.nci.nih.gov/SclcCellMinerCDB/>). Snapshot examples of  
301 genes driven by methylation (*NEUROD1*, *ASCL1*, *POU2F3*, *YAP1*, *SLFN11*, *SMARCA1*, *SOX1*  
302 and *CGAS*) are presented in Supplemental Figure S1. Genes exhibiting low or no expression did  
303 not show a consistent correlation with promoter hypermethylation, consistent with diverse  
304 mechanisms for inhibiting gene expression. For each gene, CellMinerCDB allows the identification  
305 of cell lines with methylation-dependent and independent gene expression for further molecular  
306 and mechanistic studies.

307 Unlike the histone and epithelial genes, which are primarily driven by DNA methylation,  
308 the expression of key SCLC growth-driving genes, such as the oncogenes (*MYC*, *MYCL*, *MYCN*,  
309 *AKT1*) the tumor suppressor genes (*CDKN2A*, *BAP1*, *VHL*) and the chromatin remodeler genes  
310 (*EP300* and *CREBBP*) are mainly driven by DNA copy-number alterations (Figure 3G). R values  
311 for any gene of interest (with data) are provided in Supplemental Table S5. Examples of  
312 CellMinerCDB snapshots are provided in Supplemental Figure S2 for *MYC*, *MYCL* and *MYCN*,  
313 *BAP1* and *VHL*, whose expression is driven by copy number changes but not by DNA methylation.

314

### 315 **SCLC-Global Integrates the Transcriptome of all 116 SCLC Cell Lines**

316 To take advantage of all 116 cell lines with expression data by microarray or/and RNA-seq across  
317 the five data sources (Figure 1), we regrouped them by normalization using Z-score to remove  
318 dataset batch effects. Principal component and correlation analyses validated the approach  
319 (Supplemental Figure S3A-C). The data are available under “SCLC Global” at  
320 <https://discover.nci.nih.gov/SclcCellMinerCDB/> in the pull-down tab for the “x- and y-Axis Cell  
321 Line Set”. For instance, the correlation for *ASCL1* expression in the “SCLC-Global” vs SCLC  
322 NCI/DTP gives a Pearson’s correlation coefficient of 0.99 with a p-value=1.9e-55. SCLC-Global  
323 offers many other features including cross-correlation with other databases for DNA methylation,  
324 DNA copy number, DNA Mutation, MicroRNA or Drug Activity.

325 *SCLC-Global* gene expression tools can be used to retrieve all the genes correlated with the  
326 expression of any given gene. For instance, for the *MYCN* gene (Supplemental Figure S4A-C), the  
327 top correlate (Pearson’s correlation coefficient 0.967) is *MYCNOS*, the *MYCN Opposite Strand*  
328 antisense RNA. The data for individual cell lines can also be visualized by plotting *MYCNOS*  
329 against *MYCN* in the SCLC-Global database (Supplemental Figure S4B). Notably plotting *MYCN*  
330 vs *MYCNOS* in the CCLE database using CellMinerCDB extends the finding that *MYCN* is co-  
331 expressed with its antisense RNA in both SCLC and brain tumor cell lines (Pearson’s correlation  
332 coefficient 0.81; Supplemental Figure S4C).

333

### 334 **SCLC Molecular Signatures: NE, NAPY and MYC Signatures**

335 Next, we tested the *SCLC-global* gene expression data to explore and validate the recently  
336 established molecular signatures of SCLCs (Rudin et al., 2019). As indicated previously, SCLC  
337 can be classified as neuroendocrine (NE) or non-neuroendocrine (non-NE) with only 10-25% being

338 non-neuroendocrine as defined by lack of expression of key neuroendocrine markers (Gazdar et  
339 al., 2017; Gazdar et al., 1985; McColl et al., 2017; Rudin et al., 2019; Zhang et al., 2018).

340 Using the *SCLC-Global* dataset, we scored the 116 cell lines based on the classification of  
341 Gazdar and coworkers (Augustyn et al., 2014; Zhang et al., 2018), which uses the expression values  
342 of 50 genes to calculate a NE score. This NE score is highly correlated with the expression of *SYP*  
343 (encoding Synaptophysin), *CHGA* (encoding Chromogranin A), and *INSM1* (encoding Insulinoma  
344 Transcriptional Repressor) (Figure 4A), which are used in routine diagnosis to establish the NE  
345 characteristics of SCLC biopsies. To explore the selectivity of these genes for SCLC cell lines, we  
346 examined the large collection of cell lines of the GDSC and CCLE (Rajapakse et al., 2018). *CHGA*,  
347 *INSM1* and *SYP* were selectively expressed both in SCLC and brain tumors, which is consistent  
348 with the neuronal differentiation of SCLC (Supplemental Figure S5A-B). Moreover, the NE-SCLC  
349 cell lines, which can be readily labeled in SCLC-CellMinerCDB under the “Select Tissues to  
350 Color” tab, have significantly higher levels of expression of *CHGA* and *SYP* compared to non-NE  
351 cell lines (Supplemental Figure S5C).

352 Rudin et al. (2019) proposed a more detailed molecular classification based on the  
353 expression of four transcription factor genes: *NEUROD1* and *ASCL1* for neuroendocrine, and *YAP1*  
354 and *POU2F3* for non-neuroendocrine SCLCs (Figure 4B, Supplemental Table S6). Compared to  
355 the other cancer cell lines in the GDSC-CellMiner database, the highest expression of *NEUROD1*  
356 and *ASCL1* is found in SCLC and brain tumors (Figure 4C), while *POU2F3* expression is rare and  
357 limited to SCLC cell lines (Figure 4D). In contrast, *YAP1* is not limited to SCLC and is expressed  
358 in a wide range of cancer types (except blood and lymphoid tumors) in addition to the non-  
359 neuroendocrine SCLC (Figure 4E). Differential expression of the 4 transcription factors (“NAPY”  
360 classification for short) across the SCLC-Global database of 116 cell lines clearly distinguishes the  
361 four subtypes of SCLC cell lines (Figure 4B), with similar proportions as reported by Rudin et al.  
362 (2019) across tumors and cell lines. *ASCL1* expression is commonly associated with *NEUROD1*  
363 expression (Figure 4B), indicating that a significant fraction of NE-SCLC cells have dual  
364 expression of *ASCL1* and *NEUROD1*. Figure 4F shows that 63% of the *ASCL1*-expressing cells  
365 co-express *NEUROD1* and 47% of the *NEUROD1*-expressing cells co-express *ASCL1*.

366 The NE and NAPY classifications show high concurrence across the *SCLC-Global* cell  
367 lines (93.9% agreement with Cohen’s kappa of 0.79 after excluding intermediates; Figure 4) with  
368 the three NE genes *CHGA*, *SYP* and *INSM1* most significantly overexpressed in the *NEUROD1*  
369 and *ASCL1* subgroups compared to the *POU2F3* and *YAP1* subgroups of non-NE SCLC cell lines  
370 (Supplemental Figure S5D-E).

371 The three MYC-genes *MYC*, *MYCL* and *MYCN* play key roles in SCLC carcinogenesis.  
372 *MYCL* was discovered as being selective amplified in SCLC (Johnson et al., 1987; Nau et al.,  
373 1985). Close to 80% of the SCLC cell lines highly express one of the three MYC genes with *MYC*  
374 and *MYCL* being the most prevalent (Figure 4G). Notably, and as noted previously, cells  
375 overexpressing one of the MYC-genes are negative for the two other MYC genes, indicating a  
376 mutually the mutually exclusive expression of the 3 MYC genes. Also, the non-NE SCLC cell lines  
377 (SCLC-Y and SCLC-P) express low *MYCL* and *MYCN* compared to the NE-SCLC (SCLC-A and  
378 SCLC-N) and *YAP1* cells, which selectively express *MYC* but neither *MYCL* nor *MYCN* (Figure  
379 4G and Supplemental Figure S6A-B).

380  
381

## 382 **SCLC Transcriptional Networks Focusing on the ASCL1, YAP/TAZ and NOTCH Pathways**

383 Because the four NPY genes (*NEUROD1*, *ASCL1*, *POU2F3* and *YAPI*) are transcription factors,  
384 we performed transcription network analyses (Kohn et al., 2006) in connection with the NPY  
385 classification. Snapshots are presented in Supplemental Figure S4A-B, S5C,S6C and S7A&C for  
386 the “Univariate Analyses” and in Figure 5B & D and Supplemental Figure S5E for “Multivariate  
387 Analyses” (<https://discover.nci.nih.gov/ScIcCellMinerCDB/>).

388 Figure 5A summarizes our analyses of the ASCL1-NOTCH genomic transcriptional  
389 network based on our molecular interaction map (MIM) conventions (Kohn et al., 2006)  
390 (<https://discover.nci.nih.gov/mim/index.jsp>). As a pioneer transcription factor, ASCL1 binds E-  
391 box motifs (as *NEUROD1*) to promote chromatin opening and the activation of neuronal genes.  
392 Notably both *NKX2.1* and *PROX1*, whose encoded polypeptides function together as transcription  
393 cofactors with ASCL1 are highly significantly co-expressed with *ASCL1* in the SCLC cell lines,  
394 and this co-expression is not due to the presence of those genes on the same chromosomes (Figure  
395 5A), indicating upstream regulatory transcriptional control with the likely implication of super-  
396 enhancers. As expected, the transcriptional targets of ASCL1 were co-expressed with *ASCL1*  
397 (Figure 5A-B). One of those known targets, *BCL2* is positively correlated not only with *ASCL1*  
398 expression (Figure 5A-B) but also with *POU2F3*, whereas *BCL2* expression was found negatively  
399 correlated with *NEUROD1* expression (Supplemental Figure 7A-B). Expression of the cancer-  
400 driving genes *RET*, *SOX1*, *SOX2*, *FOXA1* and *FOXA2* are also highly correlated with *ASCL1*  
401 expression (Figure 5A-B).

402 *DLL3*, another established transcriptional target of ASCL1 and a known inhibitor of the  
403 NOTCH pathway was found highly significantly correlated with *ASCL1* ( $r = 0.61$ ;  $p = 4.05e-13$ ;  
404 Figure 5A). Analysis of the NOTCH pathway whose inactivation is crucial in NE-SCLC (Gazdar  
405 et al., 2017; Leonetti et al., 2019; Ouadah et al., 2019) using the *SCLC-Global* database showed  
406 that the 3 NOTCH transcripts (*NOTCH1*, *NOTCH2* and *NOTCH3*) are jointly downregulated in  
407 the *ASCL1* SCLC cell lines (Figure 5A-B). Functional downregulation of the NOTCH pathway is  
408 consistent with the highly significantly negative correlation ( $r = -0.545$ ;  $p = 2.45e-10$ ) between  
409 *ASCL1* and *REST*, the transcriptional target of NOTCH (Figure 5A). Notably, the *NEUROD1*  
410 subset of NE-SCLC (SCLC-N) did not show a significant correlation between *NEUROD1* and  
411 *DLL3* expression ( $r = -0.18$ ; NS) (Supplementary Figure S7C-D), providing no evidence that *DLL3*  
412 overexpression acts to down-regulate the NOTCH pathway in SCLC-N cell lines. Hence, in the  
413 SCLC-A cell lines, the negative correlation between *ASCL1* and NOTCH genes could be related  
414 to the direct transcriptional inactivation of *ASCL1* by NOTCH3 (Figure 5A).

415 Of the 116 SCLC cell lines in SCLC-CellMiner, nine belong to the YAP subset (see Figure  
416 4B&E). Because expression of YAP (*YAPI*) is also a feature in a wide variety of solid tumor cells  
417 (see Figure 4E), and YAP and its regulatory Hippo signaling pathway are the focus of many  
418 ongoing studies, we explored the YAP transcriptional network in the SCLC cell lines (Figure 5C).  
419 The first notable finding is that *YAPI* expression is highly correlated with the expression of its  
420 heterodimeric partner *TAZ* (encoded by the *WWTR1/TAZ* gene) both in the *SCLC-Global* dataset  
421 (Figure 5C-D) and across the 986 cell lines of the GDSC (Supplementary Figure S8). This finding  
422 suggests a master transcriptional regulator upstream of both genes or *YAPI* acting as super-  
423 enhancer, as both genes are on different chromosomes (Figure 5C; chromosome location indicated  
424 in italic and parenthesis).

425 Next, we explored the Hippo pathway, which acts as a negative regulator of YAP/TAZ and  
426 is commonly inactivated in solid tumors (Dasgupta and McCollum, 2019; Ma et al., 2019; Totaro  
427 et al., 2018). Expression of both *LATS2* and *LATS1*, which encode the core kinase of the Hippo  
428 pathway and negatively regulate YAP by sequestering phosphorylated YAP in the cytoplasm, are  
429 significantly positively correlated with *YAP1* expression (Figure 5C-D). This unexpected finding  
430 suggesting a negative feedback loop is additionally supported by the fact that the transcripts of  
431 *MOB1A* and *MOB1B*, the cofactors of LATS1/2, are also positively correlated with *YAP1* (Figure  
432 5C-D). Moreover, the transcripts of the negative regulators of YAP, *AMOT* and *AMOTL2*, which  
433 are released by depolymerized F-actin and sequester YAP from its nuclear translocation, are also  
434 significantly positively coregulated with *YAP1* (Figure 5C-D) (Dasgupta and McCollum, 2019;  
435 Wang et al., 2019). Together, these results demonstrate that the YAP-SCLC cell lines co-express  
436 both YAP/TAZ and its negative regulator genes driving the Hippo pathway, and suggest an  
437 equilibrium (“metastable”) state where the Hippo pathway remains active to potentially negatively  
438 regulate YAP/TAZ in the Y-SCLC cells.

439 YAP/TAZ functions as a direct activator of the TEAD transcription factors (encoded by  
440 *TEAD2/TEAD3/TEAD4*), whose expressions are highly significantly coregulated with *YAP1*  
441 (Figure 5C). As expected, the transcriptional targets of the TEADs are also significantly correlated  
442 with *YAP1* expression, some of which are included in Figure 5C (bottom section. Others can readily  
443 be found and discovered using the “Compare Pattern” of SCLC-CellMiner using the “Compare  
444 Pattern” of SCLC-CellMiner with TEAD or *YAP1* as “seeds”. Among those are the cancer- and  
445 growth-related *SMAD3* and *SMAD5* genes, *CCNI/CYR61*, which encodes a growth factor  
446 interacting with integrins and heparan sulfate, and *VGLL4* (Figure 5C, bottom right and Figure 5D).

447 The NOTCH pathway is also a known transcriptional target of YAP/TAZ and the TEADs  
448 (Totaro et al., 2018). Consistent with this, we found a high positive correlation between *YAP1* the  
449 NOTCH receptor transcripts *NOTCH1*, *NOTCH2*, *NOTCH3* as well as the NOTCH transcriptional  
450 target *REST*, demonstrating the functional activation of the NOTCH pathway in SCLC-Y cells  
451 (Figure 5C-E). By contrast, and consistent with the biology of the NOTCH pathway, 4 of the 5  
452 NOTCH ligands, *DLL1*, *DLL3*, *DLL4* and *JAG2*, which act as negative regulators of the NOTCH  
453 receptors (Andersson et al., 2011) are significantly negatively correlated with *YAP1* (Figure 5E).  
454 The results of these analyses support the conclusion that the NOTCH pathway is “on” in the SCLC-  
455 Y cells. By contrast, in the SCLC-A cells, the opposite is observed: the transcripts for the NOTCH  
456 receptors and the NOTCH ligands are negatively and positively correlated with the expression of  
457 *ASCL1* (Figure 5E and Supplementary Figures S9A). Notably, the SCLC-P cells also show a  
458 positive correlation between the NOTCH receptor and *REST* effector transcripts and *POU2F3*  
459 (Figure 5F and Supplementary Figure S9A and S10A). These analyses demonstrate a clear  
460 difference between the NE-SCLC (SCLC-N & -A) and the non-NE-SCLC (SCLC-P & -Y) with  
461 respect to the NOTCH pathway; with the pathway “off” in the NE subset (N & A) and “on” in the  
462 non-NE subset (P & Y).

463 Global analyses of the NOTCH pathway across the 1,036 cell lines from 22 different tissue  
464 types of the Broad-CCLE collection (Figure 5G and Supplementary Figure S9B-C) show that  
465 *NOTCH2* and *NOTCH3* expression are coregulated in many tumor types, especially brain, lung,  
466 lymph, thyroid, pancreas and uterus (Supplementary Figure S9B-C) and that the NE- SCLC cell  
467 lines are characterized by lowest NOTCH expression (Figure 5G and Supplementary Figure S9B).  
468 By contrast, the SCLC-Y- and -P cells are found among the NOTCH expressing cells. Of note,

469 analyses of the NOTCH pathway activity measured by REST expression shows that the SCLC-Y  
470 cells cluster with the NSCLC cell lines (Figure 5G and Supplementary Figure S10B).

471  
472 **Transcriptome of SCLC-Y Cells is Common with NSCLCs and Specific to this Subgroup**

473 To further examine the relationship between the SCLC-Y cell lines and the NSCLC cell line, we  
474 performed principal component and other dimension reduction analyses with respect to the whole  
475 transcriptome data (Figure 5I). tSNE (t-distributed Stochastic Neighbor Embedding) is a method  
476 to highlight strong patterns in a dataset by reducing the dimensionality of a dataset while preserving  
477 as much ‘variability’ as possible. We performed tSNE analysis using gene expression data between  
478 NSCLC (N = 100) and SCLC (N = 60) cell lines from the GDSC data source to identify clusters of  
479 subgroups. This approach segregated the SCLC-Y together with the NSCLC cell lines. The other  
480 SCLC cell lines (SCLC-A, SCLC-N and SCLC-P) formed a distinct cluster. Also, among the few  
481 NSCLC cancer cell lines clustering with the NAP-SCLC were carcinoids of the lung and one  
482 misannotated cell line. These data support that SCLC-Y cell lines are a distinct entity among the  
483 SCLC subtypes and potentially related to NSCLC.

484 Another characteristic of the SCLC-Y cell lines is the significantly low *RB1* mutations (only  
485 one cell line among 9 showing *RB1* mutation; Figure 5H). The SCLC-Y cell lines also showed  
486 significantly reduced activity of the replication transcriptional network with highest *RB1*  
487 expression and lowest *PCNA*, *MCM2* and *RNASEH2A* expression (Supplementary Figure S11A &  
488 D-F). Additionally, the SCLC-Y cells express the mesenchymal marker *VIM* as well as the  
489 cytoskeleton component and regulators *CNN2* (actomyosin and F-actin component) and the *AMOT*  
490 genes, which regulate cell migration and actin stress fiber assembly (Figure 5C, left and right)  
491 (Dasgupta and McCollum, 2019).

492  
493 **Global Drug Activity Profiling Suggests Transcription Elongation Pathways as General Drug  
494 Response Determinant and Hypersensitivity of the SCLC-P Cell Lines**

495 To explore potential connections between the NAPY classification and drug responses, we  
496 analyzed the drug sensitivity profiles of the 66 SCLC-NCI cell lines using 134 compounds with  
497 the highest activity range (> 0.09) (Polley et al., 2016). Unsupervised hierarchical clustering  
498 generated two groups of cell lines: those globally resistant to all drugs and those globally drug-  
499 sensitive, with a bimodal distribution (Figure 6A). No obvious relationship was observed for the  
500 neuroendocrine cell lines (SCLC-N and SCLC-A), which were distributed in both clusters. Yet, all  
501 three SCLC-P cell lines clustered together among the most globally drug-sensitive whereas the  
502 SCLC-Y cell lines tended to be among the most resistant cell lines.

503 Differential gene expression followed by enrichment pathway analyses was performed to  
504 determine potential differences between the most and least drug sensitive cell lines. The most  
505 significantly enriched pathway was the ribosomal and EIF2 signaling pathway, which was  
506 selectively activated in the sensitive compared to non-sensitive cell lines. EIF2 (Eukaryotic  
507 Translation Initiation Factor 2A) catalyzes the first regulated step of protein synthesis initiation,  
508 promoting the binding of the initiator tRNA to 40S ribosomal subunits. EIF2 factors are also  
509 downstream effectors of the PI3K-AKT-mTOR and RAS-RAF-MAPK pathways. The details of  
510 the analysis are provided in Supplemental Figure S12A-B. These results suggest that global drug  
511 response in SCLC is associated with active protein synthesis.

512

## 513 **Drug Activity Profiling in Relationship with the NAPY Classification**

514 Both the ASCL1 (A) and NEUROD1 (N) subgroups showed a broad range of response to  
515 etoposide, topotecan and cisplatin, as well as to the potent PARP inhibitor talazoparib (Figure 6B  
516 and Supplemental Figure S12C). The most significant genomic predictor of response for these  
517 neuroendocrine SCLC-N & -A subgroup was *SLFN11* expression (Supplemental Figure S12C;  
518 <https://discover.nci.nih.gov/ScIcCellMinerCDB/>), which is consistent with analyses performed  
519 across other tissue types (Barretina et al., 2012; Rajapakse et al., 2018; Zoppoli et al., 2012). The  
520 potential value of *SLFN11* expression as a predictive biomarker is also borne out by its highly  
521 dynamic and bimodal expression pattern (Figure 6F). Approximately 40% of the 116 SCLC cell  
522 lines of *SCLC-global* do not express *SLFN11* (Supplemental Figure S12D).

523 The SCLC-Y cell lines showed the greatest resistance to the standard of care drugs  
524 (etoposide, cisplatin and topotecan) (Figure 6B). This result is not limited to SCLC, as a highly  
525 significant drug resistance phenotype was observed between *YAP1* expression and response to  
526 etoposide and camptothecin across the database of the CCLE-CTRP, which spans across a broad  
527 range of tissues of origin (Supplemental Figure S12E).

528 In addition to *SLFN11*, a predictive genomic biomarker of drug response is methylguanine  
529 methyltransferase (*MGMT*) for temozolomide (TMZ), which acts as a DNA methylating agent  
530 generating N7- and O6-methylguanines. *MGMT* removes O6-methylguanine, the most cytotoxic  
531 lesion. Cancer cells (typically glioblastomas) with *MGMT* inactivation are selectively sensitive to  
532 TMZ (Thomas et al., 2017). Analyses of the SCLC cell lines revealed lack of *MGMT* expression  
533 in 33% (N = 38) of the SCLC cell lines (Supplemental Figure S12D). Notably, the non-NE cell  
534 lines all expressed *MGMT*, indicating that the SCLC-P- and -Y cancer cells are predicted to be  
535 poor candidates to TMZ-based therapies (Farago et al., 2019).

536 To determine whether the NAPY classification predicts sensitivity to drugs not commonly  
537 used as standard of care for SCLC, we performed correlation analyses to identify the drugs that  
538 were significantly linked to a subtype among the 526 NCI compounds (Polley et al., 2016). The  
539 list of all the statistically significant drugs (p-value < 0.05; Kruskal Willis test) is provided in  
540 Supplemental Table S7). Eighteen drugs were highly subtype-specific (p-value < 0.01; Kruskal  
541 Willis test). Among them, 7 are PI3K-AKT-mTOR inhibitors and all of them show a higher activity  
542 in the non-NE cell lines (SCLC-Y and SCLC-P) (Figure 12D-E). The SCLC-P and -Y cell lines  
543 are also more sensitive to multi-kinase inhibitors including dasatinib or ponatinib. One agent was  
544 found specifically active in *ASCL1* high expressing cell lines: ABT-737, a *BCL2* inhibitor (Figure  
545 6C). Analyzing the GDSC, CCLE and CTRP (<https://discover.nci.nih.gov/ScIcCellMinerCDB/>)  
546 showed that all *BCL-2* inhibitors are most efficient in the SCLC-A cell lines, while the SCLC-Y  
547 cell lines are consistently resistant. The high sensitivity of the SCLC-A cell lines is consistent with  
548 the highly significant correlation between *BCL2* expression and the activity of ABT-737.

## 549 **Immune Pathways are selectively expressed in the YAP1 Subgroup of SCLCs**

551 Although immune checkpoints inhibitors (ICI) have been approved in SCLC, the benefit in an  
552 unselected patient population is modest with approximately 2-month improvement in median  
553 overall survival when immunotherapy was added to first-line platinum and etoposide.

554 To explore the activity of the immune pathways in the 116 cell lines of *SCLC-Global* and  
555 the potential value of the NAPY classification for selecting SCLC patients likely to respond to  
556 immune checkpoint inhibitors, we explored the transcriptome of the cell lines by focusing on a

557 subset of established native immune response and antigen-presenting genes. Figure 6G-H shows  
558 the unique characteristics of the SCLC-Y cell lines. Indeed, they are the only subset expressing  
559 innate immune response genes and for which expression of those genes such as the innate immune  
560 effector genes *CGAS* and *STING*, the antigen-presenting HLA gene (*HLA-E*) and the interferon-  
561 inducible genes (*IFIT3*, *IFITM1*, *IFI44L*, *IFIT*, *IFITM8P* and *IFITM3*) are positively correlated  
562 with *YAP1* expression in *CellMiner-Global*. By contrast, the NE subtypes show negative  
563 correlation between *NEUROD1* and *ASCL1* expression for those same immune genes (Figure 6G).

564 Based on the study of Wang et al. (2019) reporting a novel antigen presentation machinery  
565 transcription signature score (APM) yielding a high prediction index for tumor response to immune  
566 checkpoint inhibitors (ICI) in conjunction with tumor mutation burden (TMB), we tested the APM  
567 score in the SCLC cell lines (Supplementary Figure S13). The APM score showed a high  
568 correlation with *PD-L1* expression, which is notable as *PD-L1* is not included in the 13 genes  
569 constituting the APM score. Also, the SCLC-Y subtype showed the highest APM score  
570 (Supplementary Figure S13), consistent with the potential activation of their antigen presentation  
571 and innate immune response pathways.

572

### 573 **Cell Surface Biomarkers for Targeted Therapy in Relation with the NAPY Classification**

574 Antibody-targeted therapies including antibody-drug conjugates (ADC) represent a promising  
575 approach for specific homing, increased uptake and drug retention at tumor sites while reducing  
576 drug exposure to normal tissues and the associated dose-limiting side effects (Coats et al., 2019).  
577 Proof of concept in SCLC has been established for Rovalpituzumab tesirine (Rova-T), the ADC  
578 targeting *DLL3* with a DNA-crosslinking warhead (Das, 2017).

579 A primary criterium for efficient drug delivery treatment is to choose an exclusively or  
580 overexpressed target for the cancer cells. Figure 6I and Supplemental Figure S14 shows the  
581 expression of two receptors of clinical ADCs in the SCLC cell lines: *DLL3* [used for SCLCs as  
582 rovalpituzumab tesirine (Morgensztern et al., 2019; Rudin et al., 2017)] and the carcinoembryonic  
583 antigen *CEACAM5* [used in other clinical indications as Labetuzumab govitecan (Das, 2017)]. Figure  
584 6I shows that *DLL3* expression is highly correlated with *ASCL1* expression (Pearson correlation =  
585 0.62), suggesting that treatments targeting *DLL3*, such as rovalpituzimab tesirine, could be  
586 selective toward SCLC-A tumors (Rudin et al., 2019). *CEACAM5* is highly expressed in only a  
587 subset of SCLC-A cell lines, which may be potentially sensitive to labetuzumab govitecan (IMMU-  
588 130) and other ADCs using *CEACAM5* as their targeted receptor. Both *DLL3* and *CEACAM5*  
589 have their highest expression in SCLC among all GDSC tissue types (Supplemental Figure S14).  
590 Expression of *TACSTD2* (*TROP2*), which is used as target for sacituzumab govitecan (IMMU-132)  
591 in patients with triple-negative breast cancer (TNBC), exhibits a low expression level in all SCLC  
592 cell lines, suggesting that using *TACSTD2* as targeted receptor may not be efficient in SCLC  
593 (Supplemental Figure S15).

594 Among potential new targets for the development of ADCs, the previously described  
595 specific neuroendocrine markers *NCAM1*, *CD24*, *CADM1* and *ALCAM* are highly expressed in  
596 non-*YAP1* SCLC (Figure 6J), suggesting the potential of developing ADCs targeting such surface  
597 receptors for NE-SCLC and SCLC-P patients. In contrast, the non-neuroendocrine surface markers  
598 *CD151* and *EPH2* are highly expressed in the *YAP1* cell lines (Figure 6K), suggesting their  
599 potential as target receptors for SCLC-Y cancers.

600

## 601 Discussion

602  
603 SCLC CellMiner (<https://discover.nci.nih.gov/ScLcCellMinerCDB/>) provides a unique resource  
604 including the most extensive SCLC datasets not only in terms of number of cell lines but also by  
605 its extensive omics and drug sensitivity databases. It also includes high resolution methylome data,  
606 which were performed for the purpose of the current study. SCLC CellMiner enables casual and  
607 experienced user to perform cross-comparison for all the omic and drug features of the SCLC cell  
608 lines of the NCI-DTP (SCLC NCI/DTP), Sanger-MGH (SCLC GDSC), Broad-MIT (SCLC CCLE  
609 and SCLC CTRP) and UT Southwestern (SCLC UTSW). It demonstrates the high reproducibility  
610 of the data for given cell lines across databases, which led to building an integrated platform  
611 (“SCLC Global”) to search genomic and drug features across the whole 116 cell line database.

612 Human cancer-derived cell lines remain the most widely used models and the primary basis  
613 to study the biology of cancers. They also enable the testing of new drugs and determinant of  
614 response hypotheses to improve cancer treatment (Gillet et al., 2013; Marx, 2014). A recent  
615 example is the discovery of SLFN11 as a dominant determinant of response to widely used  
616 chemotherapeutic agents targeting replication including topoisomerase inhibitors, platinum  
617 derivatives, gemcitabine and hydroxyurea as well as PARP inhibitors (Barretina et al., 2012; Murai  
618 et al., 2019; Zoppoli et al., 2012). Hence, the large database of SCLC cell lines offers a spectrum  
619 of models with the full genetic and molecular diversity seen in this subtype of cancer, as  
620 exemplified by the clear division of the 116 cell lines across the four recently proposed subgroups  
621 of SCLCs (NAPY classification) (Rudin et al., 2019). Although it appears that at the genomic level  
622 driver mutations are retained, several studies reveal a drift at the transcriptomic level, leading to  
623 the conclusion that cancer cell lines bear more resemblance to each other, regardless of the tissue  
624 of origin, than to the clinical samples that they are supposed to model. However, several other  
625 studies have come to the opposite conclusion, demonstrating the need for human cancer cell line  
626 panels (Barretina et al., 2012; Neve et al., 2006; Reinhold et al., 2019; Wang et al., 2006; Weinstein,  
627 2012; Zoppoli et al., 2012). Although it was believed that tumor cells lost their differentiated  
628 properties during cell culture, it was later shown that this “dedifferentiation” was the result of  
629 stromal cell overgrowth and that “true” tumor cell cultures often retained their differentiated  
630 properties (Sato, 2008). For lung cancer cell lines, it has been shown that the genomic drift during  
631 culture life is not as great as commonly believed (Wistuba et al., 1999). The recent analyses across  
632 SCLC cell lines, PDX models and human tissues reported by Rudin et al. (2019) and our present  
633 analyses support this conclusion.

634 SCLC is known to be highly proliferative (Gazdar et al., 2017) and to be under replication  
635 stress (Thomas and Pommier, 2016). The SCLC CellMiner transcriptome data provide evidence  
636 confirming that specific feature. Indeed, genes known to be involved in DNA replication  
637 exemplified by *PCNA*, *MKI67* (encoding Ki67), *FEN1* and *PARP1* are highly expressed in SCLC  
638 compared to the other subtypes of cancers (Supplemental Figure S16). Moreover, we find evidence  
639 of chromatin alteration in SCLC. Not only are many core histone genes hypermethylated (see  
640 Figure 3) but also *H2AFY*, a non-canonical histone belonging to the H2A family encoding  
641 macroH2A.1, exhibits high expression in the SCLC cell lines. Two *H2AFY* splice variants have  
642 been identified and SCLC cell lines predominantly express high levels of the macroH2A1.2 variant  
643 compared to macroH2A1.1 (both encoded by *H2AFY*). The macroH2A1.2 splice variant is known  
644 to promote homologous recombination and is essential for proliferation (Kim et al., 2018). This  
645 further underscores the highly proliferative characteristic of SCLC cell lines, in addition to the  
646 overexpression of the MYCs genes (see Figure 4 and Supplementary Figure S2 and S6).



647 In the context of chromatin and the histone genes, *ACTL6B*, which encodes a subunit of the  
648 BAF (BRG1/brm-associated factor) complex in mammals is highly expressed in the SCLC cell  
649 lines (Supplemental Figure S17). The BAF complex is functionally related to SWI/SNF complexes,  
650 which are known to facilitate transcriptional activation of specific genes by antagonizing  
651 chromatin-mediated transcriptional repression. Interestingly, we found that the expression of  
652 *ACTL6B* is high and specific to SCLC and brain tumor cell lines and that its expression is highly  
653 correlated with other the expression of other chromatin genes including *HMGN2*, *KDM4B* and  
654 *SMARCA4* (Supplemental Figure S17). Among the SCLC cell lines, only the neuroendocrine cell  
655 lines (high *ASCL1* or high *NEUROD1*) harbor high expression of *ACTL6B* while the *YAP1* SCLC  
656 cell lines express significantly less *KDM4B* and *SMARCA4* (Supplemental Figure S17). These  
657 results suggest that this specific BAF complex subunit is critical in neuroendocrine SCLCs.

658 Supporting the importance of epigenetics in SCLC carcinogenesis, we provide an extensive  
659 DNA methylation database including the methylome of 66 cell lines from the NCI performed by  
660 high resolution Affymetrix 850k array and the analysis of 61 cell lines from the GDSC analyzed  
661 by 450k Array (see Figures 1 and 3) and demonstrate that SCLC cell lines exhibit a distinct  
662 methylation profile. First, they are globally hypomethylated, suggesting a plasticity of SCLC cell  
663 lines compared to the other cancers. Secondly, they exhibit a distinct and coherent profile of  
664 methylation compared with other subtypes of cancers, especially NSCLC (see Figure 3).  
665 Interestingly, most of genes with low methylation are involved in neurological pathway suggesting  
666 that neuroendocrine differentiation could be driven by epigenetic and especially DNA promoter  
667 methylation. Only a few studies focused on SCLC methylation profile. In 2013, Kalari *et al.* found  
668 consistent results and identified more than one hundred specifically hypermethylated genes in  
669 SCLC with gene ontology analysis indicating a significant enrichment of genes involved in  
670 neuronal differentiation (Kalari et al., 2013). By contrast, Poirier et al. (2015) reported that SCLC  
671 tend to have a high methylation level. The apparent discrepancy could be due to the fact that they  
672 included PDX and tumor samples and that they did not measure the global level of promoter  
673 methylation, as we have done, but the proportion of highly variable CpGs. Yet, they concluded,  
674 that high methylation instability is consistent with the plasticity of SCLC (Poirier et al., 2015).

675 SCLC CellMiner validates the recently proposed SCLC NAPY classification (Rudin et al.,  
676 2019) (see Figure 4), and provides insights into the four NAPY genes and their coordinated  
677 pathway network and connections with the NOTCH pathway (Figures 5). The coregulation of many  
678 functionally related genes is notable for the *ASCL1* and *YAP1* pathways examined in Figure 5.  
679 Indeed, *ASCL1* expression is highly correlated with the expression of its transcription coactivators  
680 *NKX2-1* and *PROX1* in spite of their different chromosome locations. The same observation applies  
681 to the *YAP1/TAZ* (*WWTR1*) heterodimer, suggesting master regulators upstream from the *ASCL1*  
682 and *YAP1* genes. Identifying those potential regulators (super-enhancers, microRNAs or non-  
683 coding RNAs) warrants further investigations, which hopefully will be fostered by the SCLC  
684 CellMiner resources. Unexpectedly, we found that the expression of the genes encoding the Hippo  
685 pathways (*MOB1A/B* and *LATS1/2*) and its coactivator (*AMOT* and *AMOTL2*) are co-expressed  
686 with highly significant correlation with *YAP1*. This finding suggest that the SCLC-Y cell lines are  
687 primed with a potential negative feedback from the Hippo pathway. Consistent with the results of  
688 Rudin et al. (2019) *al.*, the NAPY classification shows that the cell lines driven by *ASCL1* and  
689 *NEUROD1* often overlap (see Figure 4F) except for their relationship with the NOTCH pathway  
690 where the SCLC-A cells show a stronger negative correlation with NOTCH gene expression than  
691 the SCLC-N cells (see Supplementary Figure 9). Both *ASCL1* and *NEUROD1* are transcriptional  
692 regulators and main drivers of neuroendocrine pathways and the cell lines co-expressing both gene

693 share common features in terms of co-expressed neuroendocrine genes, MYCL-MYCN  
694 overexpression, drug sensitivities and cell surface markers (see Figures 4 & 6), questioning how  
695 these two groups define clearly distinct entities.

696 Transcriptome and drug response analyses highlight the distinguishing features of the  
697 SCLC-Y cell lines. Indeed, by contrast to the three other transcription factors (ASCL1, NEUROD1  
698 and POU2F3), *YAP1* expression is not specific to SCLC and *YAP1* is widely and differentially  
699 expressed across a wide range of cancer cell lines (see Figure 4) (Ma et al., 2019). Notably,  
700 transcriptome analyses cluster the SCLC-Y with NSCLC cell lines, suggesting a different cellular  
701 origin for the SCLC-Y cancers (see Figure 5F). The SCLC-Y cell lines also express the NOTCH  
702 pathway, which is opposite to the SCLC-A neuroendocrine cell lines (see Figure 5 and  
703 Supplementary Figure S9). This differential feature could be related to the direct transcriptional  
704 activation of the NOTCH pathway by YAP/TAZ (see Figure 5C) (Yimlamai et al., 2014). In  
705 addition, SCLC-Y cell lines do not express *MYCL* or *MYCN* but rather *MYC* (see Figure 4), and  
706 consistent with the results of McColl et al. (2017), SCLC-Y cell lines tend and not to be mutated  
707 for *RBI* (see Figure 5H) and to express *RBI*, which is not the case for the 3 other SCLC subtypes  
708 (see Figure S11). We also found that the SCLC-Y cells express the DNA replication and  
709 proliferation genes to a lower level than the other SCLC subgroups (see Supplemental Figures S11  
710 & S16). Finally, the SCLC-Y cell lines were often derived from non-smoker patients  
711 (Supplementary Table S1 & Figure 18). One of the limitations of this finding is that many cell lines  
712 were not annotated, so these results concerning tobacco status require confirmation in a larger  
713 cohort. In total, our data highlight that SCLC-Y cell lines are probably derived from a different cell  
714 type compared to the other neuroendocrine SCLC.

715 The SCLC-Y also differ from the other subgroups, SCLC-N, A & P in terms of drug  
716 sensitivity. As demonstrated in Figures 6 & S12, while the SCLC-P cell lines are consistently  
717 among the most sensitive NAPY subgroup to the standard of care treatments (etoposide, cisplatin  
718 and topotecan) and to the PARP inhibitor talazoparib, the SCLC-Y cells are most resistant to those  
719 treatments. The SCLC-N and -A show a wide range of responses to those classical chemotherapies  
720 with some cell lines highly responsive and some not. A significant determinant of response to those  
721 standard of care treatments is *SLFN11* expression (Murai et al., 2019), with a broad range of  
722 expression and approximately 40% of the 116 SCLC cell lines expressing no or very low *SLFN11*  
723 transcripts (see Figures 6F & S12). Another potential determinant of response is *MGMT* with  
724 approximately 33% of the 116 SCLC cell lines expressing no or very low *MGMT* transcripts (see  
725 S12D), which suggest the potential of using temozolomide in such tumors, especially in the case  
726 of brain metastases (Pietanza et al., 2018; Thomas et al., 2017).

727 In spite of the resistance of non-neuroendocrine (or variant) SCLC cells (SCLC-P and -Y  
728 subgroups) to the standard of care treatments (Gazdar et al., 1992), we find that those subgroups  
729 appear responsive to mTOR and AKT inhibitors (see Figure 6D-E). Our result is consistent with a  
730 recent study (Wooten et al., 2019) showing that non-neuroendocrine SCLC cell lines are sensitive  
731 to PI3K-AKT-mTOR, AURKA inhibitors and HSP90 inhibitors. Moreover, we found that the main  
732 difference between sensitive and non-sensitive cell lines is activation of the EIF2 pathway (see  
733 Figures 6 and S12), which is consistent with the PI3K-AKT-mTOR and MKI inhibitors sensitivity  
734 of SCLC-Y and SCLC-P. This hypothesis could open new therapeutic options in SCLC using  
735 translation-targeted drugs in development (Bastide and David, 2018; Sulima et al., 2017).  
736 Treatments targeting the mTOR pathway in SCLC patients have been evaluated or are in ongoing

737 clinical trials. The results with monotherapy were not successful (Tarhini et al., 2010). Our findings  
738 suggest that better results might be obtained with appropriate patient selection.

739 Three final therapeutic insights can be derived from our study. First, the SCLC-Y cell lines  
740 are the only NAPY subgroup with antigen presenting and native immune predisposition (see Figure  
741 6) while the neuroendocrine SCLC are among the most immune silent cancer cell lines based on  
742 their transcriptome profiles (see Figures 6G-H and S13). If verified in clinical samples, this finding  
743 might enable the selection of SCLC patient of the YAP1-expressing subgroup for immune  
744 checkpoint treatments. The second insight concerns the existence of potential surface markers that  
745 could be targeted selectively for the NAPY subgroups. As shown in the lower part of Figure 6, it  
746 is clear that the SCLC-Y cell lines express neither the therapeutically-relevant surface epitopes  
747 DLL3 or CEACAM5 (Das, 2017; Morgensztern et al., 2019; Rudin et al., 2017), which tend to be  
748 specific for the SCLC-A (and N) cancer cells. Yet, SCLC CellMiner could be used to identify  
749 potential surface markers of SCLC-Y cancers such as CD151 and EPHA2 (see Figure 6K). Finally,  
750 the SCLC-Y subgroup might respond to the YAP1 and NOTCH inhibitors in clinical development  
751 (Crawford et al., 2018; Leonetti et al., 2019).

752 Our analyses demonstrate the value of cancer cell line databases and imply that updating  
753 drug testing with new clinical drug candidates will provide valuable information to guide clinical  
754 trials. The results of our analyses also suggest the potential value of using the NAPY classification  
755 to select patients for targeted clinical trials. It is likely that genomic signatures based on genes  
756 expression (transcriptome) and DNA methylation (methylome) will have to be developed to build  
757 reliable tools to assign samples to each of the NAPY subgroups and determine their prognostic and  
758 therapeutic value. It also appears important to perform single-cell transcriptome and omic analyses,  
759 sequential biopsies and biopsies of different tumor sites to evaluate the tumor heterogeneity and  
760 plasticity of SCLCs.

761

762  
763

Table 1: Examples of SCLC\_CellMiner capabilities:

|    | SCLC_CellMiner Explores & Validates                                                                | Method                                                                                                                                                                                                                                                       | Examples                 | Examples of Findings                                                                                                                                         |
|----|----------------------------------------------------------------------------------------------------|--------------------------------------------------------------------------------------------------------------------------------------------------------------------------------------------------------------------------------------------------------------|--------------------------|--------------------------------------------------------------------------------------------------------------------------------------------------------------|
| 1  | Cell line reproducibility, & consistency                                                           | <b>Univariate Analyses: Plot Data:</b> Expression of the same gene <b>across different datasets (X &amp; Y)</b>                                                                                                                                              | Figs. 1                  | Cell lines are highly reproducible across datasets                                                                                                           |
| 2  | Omic data robustness & reproducibility                                                             | <b>Univariate Analyses: Plot Data:</b> Expression, copy number variation, promoter methylation, mutations for the same gene <b>across datasets (X &amp; Y)</b>                                                                                               | Figs. 1B-C               | Transcripts, promoter methylation, gene copy number are highly reproducible across datasets                                                                  |
| 3  | Drug data robustness & reproducibility                                                             | <b>Univariate Analyses: Plot Data:</b> Activity of the same drug <b>across datasets (X &amp; Y)</b>                                                                                                                                                          | Fig. 2E-F                | Warning: Not all drugs are consistent across dataset                                                                                                         |
| 4  | Integrates all the SCLC cell line genomic datasets under SCLC_Global (NCI, GDSC, CCLE, CTRP, UTSW) | Use the pull-down tabs for <b>Cell Line Sets</b> and choose <b>SCLC_Global</b>                                                                                                                                                                               | Fig. 4F; 6H; S4A-B; S5C  | The 119 SCLC cell lines can be classified in the 4 groups of NAPY; Development of NAPY genomic signatures                                                    |
| 5  | Integration with CellMinerCDB                                                                      | Open in parallel:<br><a href="http://discover.nci.nih.gov/cellminerfdb">http://discover.nci.nih.gov/cellminerfdb</a>                                                                                                                                         | Figs. 2, 4, 5            | POU2F3 is selective for SCLC; YAP1 is expressed widely beyond SCLC; ASCL1 is co-expressed with NEUROD1                                                       |
| 6  | Select and compare subsets of cell lines based on tissue or origin or metadata: NAPY, TNBC, NSCLC  | <b>Univariate Analyses:</b> select Y axis: <b>Select Tissue/s of Origin</b> or <b>Select Tissues to color</b> (NEUROD1, ASCL1, POU2F3, YAP1, NE)                                                                                                             | Figs. 5F; S5; S15        | NEUROD1 and ASCL1 are also selectively expressed in CNS cancer cell lines                                                                                    |
| 7  | Test Phenotypic data (mda): NE, APM, EMT                                                           | <b>Univariate Analyses:</b> select <b>Data Type</b> mda: <b>NE, APM, EMT</b> . Additional selection can be done for subset (see # 6)                                                                                                                         | Fig. 6                   | NE cell lines have low Antigen Presenting Machinery score (APM)                                                                                              |
| 8  | Tissue- or Subset-type specific analyses (NAPY; NE)                                                | <b>Select Tissue/s of Origin</b> or <b>Select Tissues to color</b>                                                                                                                                                                                           | Figs. 5-6; S10; S13; S17 | YAP1 cell lines have lower replication and highest APM score                                                                                                 |
| 9  | Epigenetics: promoter methylation for any given gene                                               | <b>Univariate analyses: Plot Data:</b> Expression of a given gene vs its methylation (X & Y <b>Data Type</b> ) within a given <b>Cell Line Set</b> or across datasets (independent datasets can be tested for missing <b>Data Type</b> and confirmation)     | Fig. S1                  | Promoter methylation is a driver for gene expression (NAPY genes; SLFN11; MGMT; SMARCA1; CGAS)                                                               |
| 10 | Gene amplification and deletions for any given gene                                                | <b>Univariate analyses: Plot Data:</b> Expression of a given gene vs copy number (X & Y <b>Data Type</b> ) within a given <b>Cell Line Set</b> or across datasets (independent datasets can be tested for validation and missing <b>Data Type</b> )          | Figs. 1; 3; S2           | MYC genes and other oncogenes are often driven by copy number variation (CNV)                                                                                |
| 11 | Integrate and complement different datasets for common cell lines                                  | <b>Univariate Analyses: Plot Data:</b> Plot different parameters ( <b>Data Type</b> for genomic or drug response) across <b>Cell Line Sets (X &amp; Y)</b> to counter missing data in one dataset                                                            | Figs. 1; 2; 6            | Drug response data in one dataset can be correlated with genomics of another dataset                                                                         |
| 12 | Genomic pathway discovery (coregulated genes and microRNAs)                                        | <b>Univariate analyses: Plot Data:</b> expression of a given gene (X or Y <b>Data Type</b> ) within a given dataset or across datasets; also use the <b>Compare Patterns</b> tab.                                                                            | Figs. 5; 6; S4; S5       | ASCL1 and YAP1 are integrated in tight genomic networks connected with the NOTCH pathway                                                                     |
| 13 | Discover determinants of drug response and targeted drug delivery                                  | <b>Univariate Analyses: Plot Data: Compare Patterns:</b> Coregulated genes for a given gene (X or Y) within a given <b>dataset</b> (independent datasets can be tested for confirmation)                                                                     | Figs. 6; S12-14          | Resistance of YAP1 cell lines to chemotherapy and potential response to mTOR and immune checkpoint inhibitors; NAPY-specific antigen cell surface biomarkers |
| 14 | Validate genomic determinant of drug response                                                      | <b>Univariate Analyses: Plot Data: Compare Patterns:</b> plot genomic parameter vs drug (X or Y <b>Data Type</b> )                                                                                                                                           | Fig. 6                   | Validation of SLFN11 for DNA damaging chemotherapy                                                                                                           |
| 15 | Examine drug correlations: COMPARE analyses                                                        | <b>Univariate Analyses: Plot Data: Data Type:</b> drug vs drug (X or Y); also select <b>Compare patterns</b> to identify drug-drug correlations                                                                                                              | Fig. S1                  | Cell lines sensitive to etoposide are cross-sensitive to topotecan                                                                                           |
| 16 | Multivariate models of drug response & genomic features                                            | <b>Multivariate Analyses: Cell Line Set; Response Data Type; Predictor Data Type/s; Predictor Identifier:</b> enter drug and genomic parameters to be tested as identifier or use <b>LASSO</b> to discover additional non-redundant determinants of response | Fig. 5B & D; Fig. S5E    | Discover independent omic or drug parameters to build a molecular signature for drug response or gene expression                                             |
| 17 | Data download                                                                                      | <b>Univariate Analyses: View Data: Download</b> tabs or <b>Multivariate Analyses: Download</b> tab                                                                                                                                                           | Fig. 6                   | Allow further in depth analyses and data download in Excel                                                                                                   |
| 18 | Drug identifier conversion                                                                         |                                                                                                                                                                                                                                                              |                          |                                                                                                                                                              |

764  
765  
766

Highlighted in red characters are the option tabs of SCLC\_CellMiner: (<https://discover.nci.nih.gov/ScleCellMinerCDB/>)

767 **Figures and legends**

768  
769

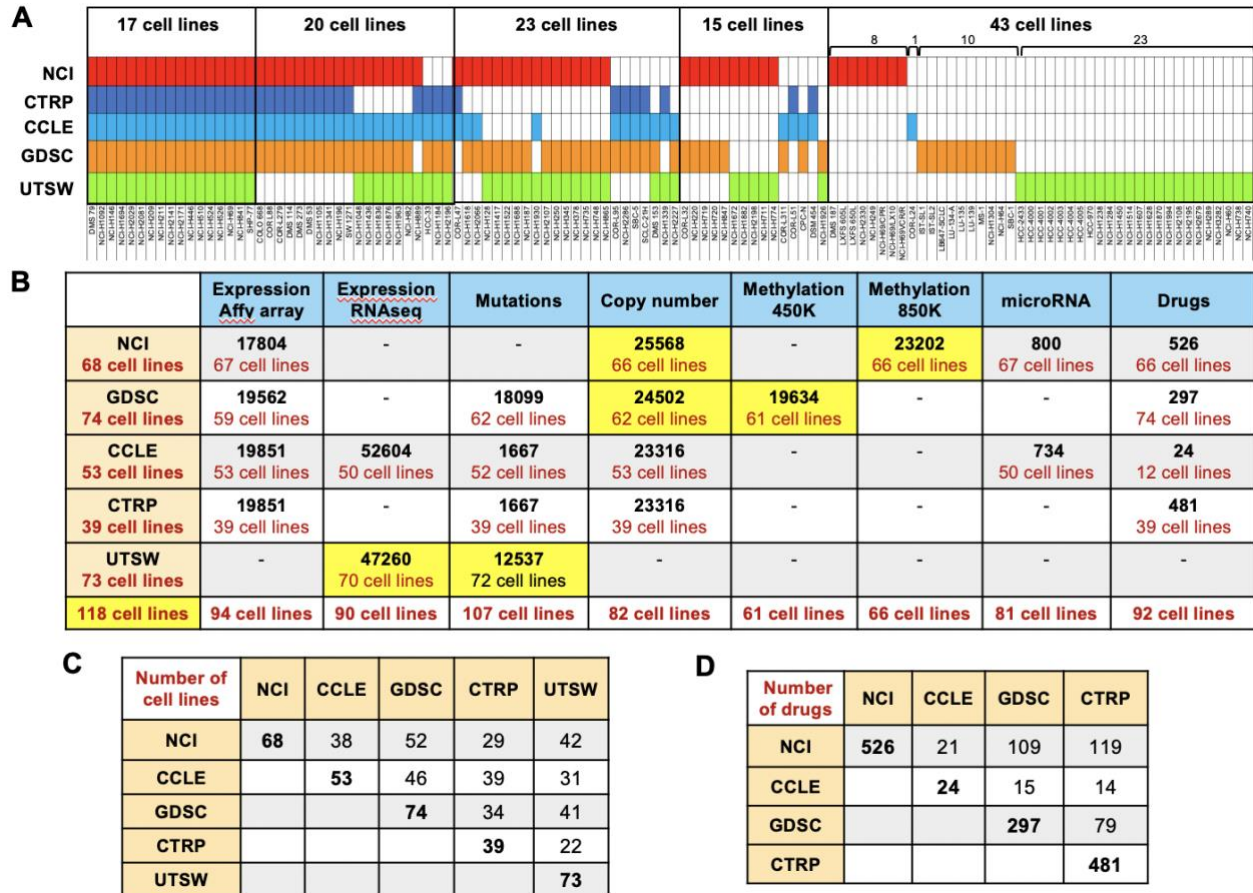

770  
771  
772  
773  
774  
775  
776  
777  
778  
779  
780  
781  
782  
783

**Figure 1 – Summary of the data included in SCLC-CellMiner and resources**

(A) Cell line overlap between the five data sources. Each colored box represents one cell line. The cell lines in red are from the NCI database (N = 68), in dark blue from CTRP (N = 39), in light blue from CCLE (N = 53), in orange from GDSC (N = 74) and in green from UTSW (N = 73). Cell line details are provided in Table S1. (B) Summary of the genomic and drug activities data for the five data sources in SCLC CellMinerCDB (<https://discover.nci.nih.gov/ScIcCellMinerCDB/>). The number of SCLC cell lines for datasets and sources are indicated. For microarray, mutations, copy number and methylation data, the numbers indicate the number of genes. For RNA-seq data, the numbers indicate the number of transcripts. The bottom row show the total number of cell lines (N = 118) integrated in SCLC CellMinerCDB. New data analyses performed and made available are highlighted in yellow. (C) Cell line overlap between data sources. Details of the cell line overlap are provided in Table S2. (D) Drug overlap between data sources.

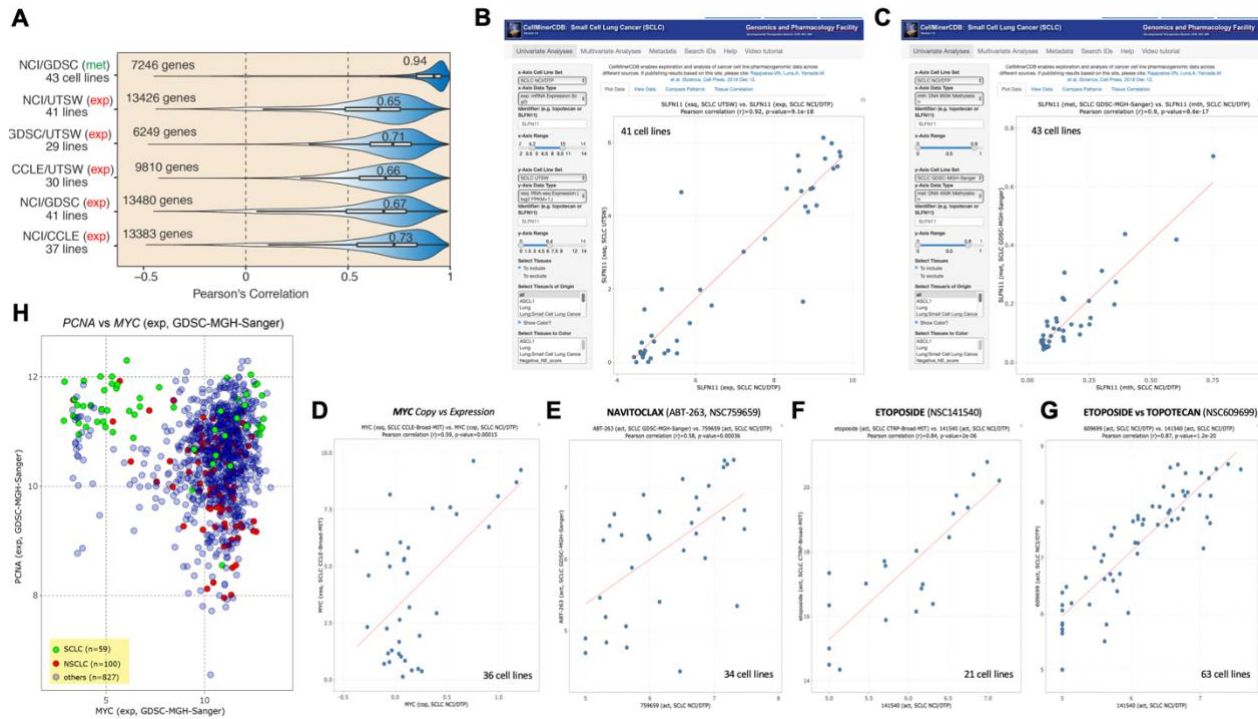

784  
785  
786  
787  
788  
789  
790  
791  
792  
793  
794  
795  
796  
797  
798  
799  
800  
801  
802  
803  
804  
805  
806  
807  
808

**Figure 2 – Validation and reproducibility of the SCLC-CellMiner data with snapshots illustrating representative outputs of SCLC-CellMiner (<https://discover.nci.nih.gov/ScLcCellMinerCDB/>)**

(A) Reproducibility between data sources. The figure represents the expression and methylation Pearson correlations between the indicated data sources for matched cell lines (see Figure 1). The median of expression Pearson correlation is 0.65, 0.67, 0.73, 0.66 and 0.71 for NCI /UTSW, NCI/GDSC, NCI/CCLE, UTSW/CCLE, and UTSW/GDSC, respectively. The median of methylation Pearson correlation between NCI and GDSC data sources is 0.94. (B) Snapshot from SCLC-CellMiner showing the reproducibility of *SLFN11* gene expression across the 41 common cell lines independently of the methods used to measure *SLFN11* expression (AffyArray for NCI/DTP on the x-axis vs RNA-Seq for UTSW). Each dot is a different cell line, which can be identified by moving the cursor to the dot on the CellMiner website. The data can also be readily displayed in tabular form and downloaded in tab-delimited format by clicking on the “View Data” tab to the right of the default “Plot Data” tab (see upper section of Figures 2B & C). (C) Snapshot from SCLC-CellMiner showing the reproducibility of *SLFN11* promoter methylation across the 43 common cell lines independently of the methods used to measure *SLFN11* expression (850 k Illumina Infinium MethylationEPIC BeadChip array for NCI/DTP on the x-axis vs Illumina HumanMethylation 450K BeadChip array for GDSC). (D) SCLC-CellMiner demonstrates the highly significant correlation between *MYC* DNA copy number (new data derived from the 850 K AffyArray methylome of the NCI-SCLC cell lines and *MYC* expression (data from CCLE) for the 36 common cell lines. (E-G) Examples (image snapshots from SCLC-CellMiner) of drug activity correlations across databases for the indicated drugs and the common cell lines (H) High proliferation signature of SCLC cell lines based on high *PCNA* and *MYC* expression. Note that SCLC (green) overexpress *PCNA* but fall into two groups with respect to *MYC* (high and low). The image was obtained through CellMinerCDB with the GDSC database (<http://discover.nci.nih.gov/cellminerfdb>).

809

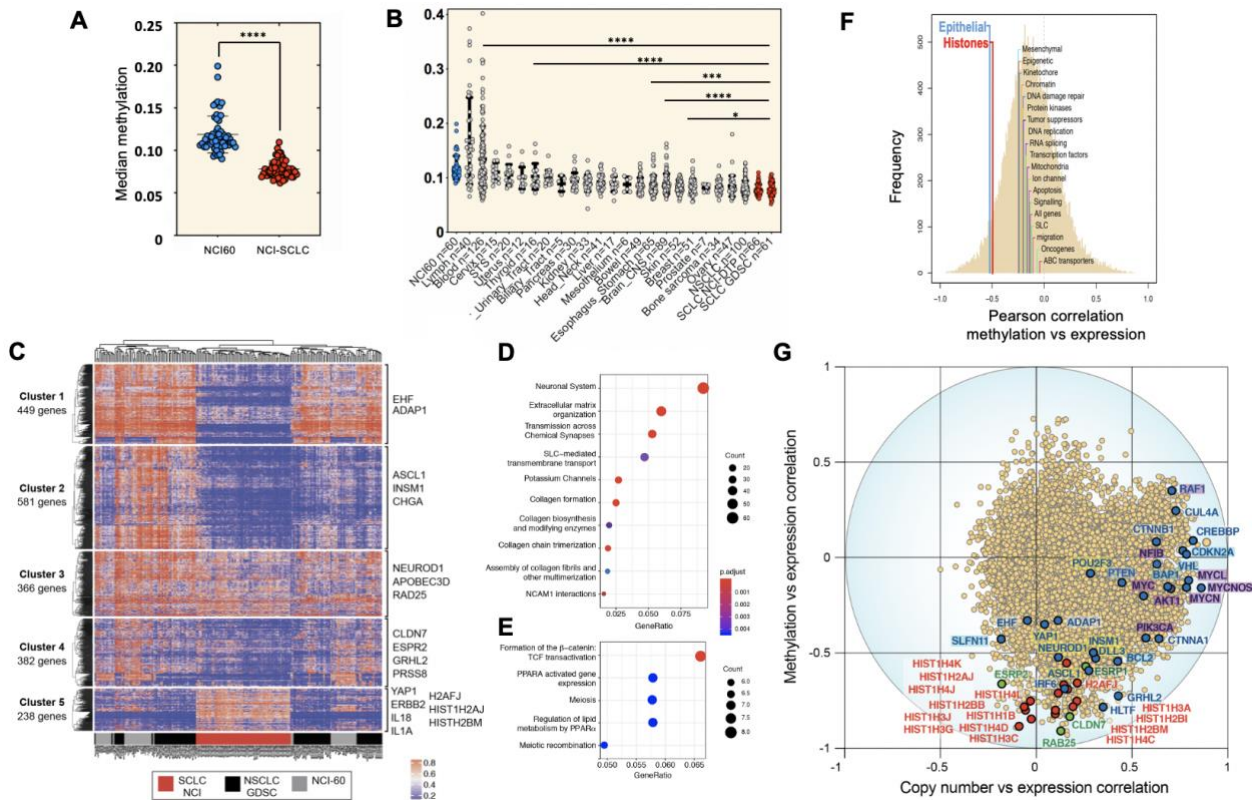

810

811

### Figure 3 – Methylation profile of SCLC cell lines

812

(A) SCLC cell lines exhibit low global methylation level compared to the non-SCLC of the NCI60 and of the

813

GDSC (B). Each point represents the median methylation level of individual cell lines for the total set of 17,559

814

genes. Twenty one different cancer subtypes are ranked according their global methylation level. SCLC cell lines

815

from two different sources (NCI and GDSC; in red) show the lowest global level of methylation. (C) Comparison

816

of the methylation profiles between SCLC cell lines (red bar at bottom), NSCLC cell lines included in the GDSC

817

and NCI-60 (black bar), and non-lung cancer cell lines from the NCI-60. The heatmap displays the median level

818

of methylation of 2,016 genes with high dynamic range (genes with a standard deviation > 0.25 across the data

819

sources) in the cell lines from SCLC-NCI (N=66), NSCLC-GDSC (N=75) and the NCI60 (N=60). Dark blue and

820

dark red represent lowest and highest methylation median levels, respectively. Subtypes of the cell lines is

821

indicated at the bottom (SCLC: red, NSCLC: black and NCI60: grey). SCLC cell lines represent one independent

822

and distinct cluster. Among the 5 gene clusters, 3 show low methylation and one high methylation levels in

823

SCLC. Examples of key SCLC genes are indicated at right. Details are provided in Supplemental Table S4. (D)

824

Pathway analysis for clusters 1 & 2. (E) Pathway analysis for cluster 5. (F) Functional categories with significant

825

correlation between gene transcript expression and DNA methylation. The figure shows histograms of the

826

distribution of correlations of 17,144 transcript expression and DNA methylation data for the NCI-SCLC cell

827

lines (N = 66). Median values are shown for the transcript expression versus DNA methylation level correlations

828

of 20 functional groups of genes (defined in Supplementary Table S5). The x-axis are the Pearson correlations

829

of the transcript expression versus the DNA methylation values, and the y-axis is the frequency. (G) Correlations

830

between gene expression and predictive values of DNA copy number (X-axis) vs DNA methylation (Y-axis). An

831

R value of 0 indicates no predictive power. R value of 1 or -1 and +1 indicate perfect negative and positive

832

predictive power, respectively. Each point represents one of a total of 14,046 genes analyzed. Oncogenes and

833

tumor suppressor genes (highlighted in purple and in blue, respectively) are primarily driven by copy number.

834

Histone genes (red), and epithelial genes (green) are primarily driven by DNA methylation (see Supplementary

835

Table S5 for details. SCLC key genes (ASCL1, NEUROD1, POU2F3 and YAP1) are also indicated.

836

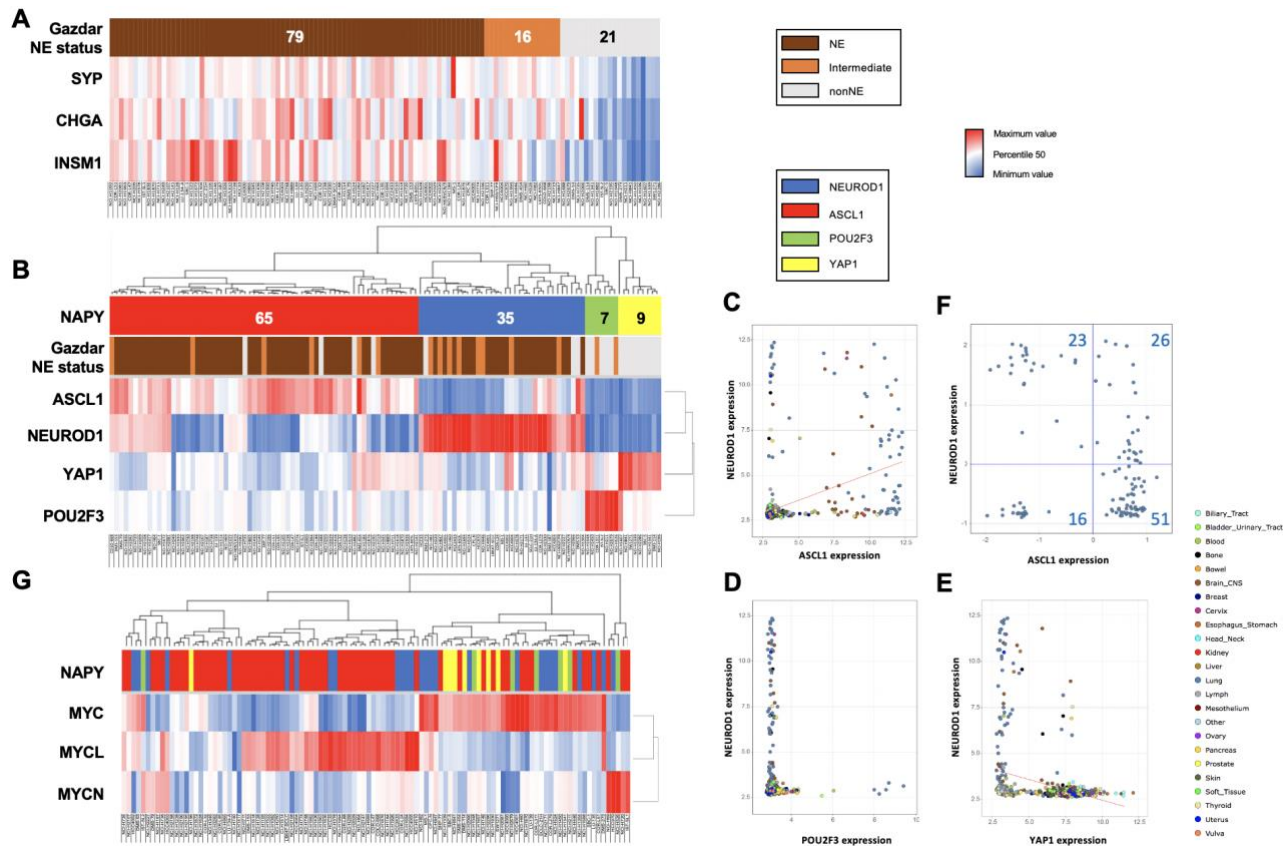

837  
838  
839  
840  
841  
842  
843  
844  
845  
846  
847  
848  
849  
850  
851  
852  
853  
854  
855  
856  
857  
858  
859  
860  
861  
862

### Figure 4 – SCLC genomic molecular classifications

(A) Neuroendocrine *versus* non-neuroendocrine classification based on the expression of 50 genes (Gazdar et al., 2017). Neuroendocrine (NE; in dark brown) and non-neuroendocrine status (nonNE; in grey) scores are represented for each cell line (N = 116). In light brown are the cell lines with an intermediate score. Numbers at the top correspond to the number of cell lines in each group. Expression of the clinical histological biomarkers *CHGA*, *SYP* and *INSM1* is included. They were obtained after normalization by Z-score (see Supplemental Figure S2). Red and blue correspond to high and low gene expression, respectively. Details are provided in Supplementary Table S3. (B) Classification based on *NEUROD1*, *ASCL1*, *POU2F3* and *YAP1* (NAPY) expression (Rudin et al., 2019). The heatmap displays expression of the NAPY genes in the overall 116 SCLC cell lines of SCLC-CellMiner. Expression values across the 5 data sources were obtained after normalization by Z-score (see Supplemental Figure S2). Complete distance hierarchical clustering shows the expected 4 groups of cell lines. *ASCL1* (N = 65) and *NEUROD1* (N = 35) high-expressor cell lines are considered as NE-SCLC cell lines and *POU2F3* (N = 7) and *YAP1* (N = 9) cell lines, non-NE-SCLC cell lines. The Gazdar classification is included for comparison. Details are provided in Supplementary Table S3. (C) *NEUROD1* and *ASCL1* are specific for both SCLC and brain tumor cell lines. Expression of *ASCL1* versus *NEUROD1* in the GDSC database and processed with CellminerCDB. Each point represents a cell line (N = 986). (D) Common co-expression of *NEUROD1* (y-axis) and *ASCL1* (x-axis) in the 11 SCLC. Each point represents a cell line. (E) *POU2F3* is selectively expressed in SCLC but not in brain tumor cell lines (N=986 from GDSC processed with CellMinerCDB). (F) *YAP1* expression is not specific to SCLC. *YAP1* exhibits a high range of expression across the different subtypes of cancer cell lines of the GDSC database (N=986). Plots in panels E-F are snapshots from CellMinerCDB (<http://discover.nci.nih.gov/cellminerfdb>). (G) Classification based on MYC genes expression. The heatmap displays expression of *MYC*, *MYCL* and *MYCN* in 106 SCLC cell lines across the 5 data sources after normalization by Z-score (see Supplemental Figure S2). The figure also provides the NAPY classification for each cell lines. Details are in Supplementary Table S4.



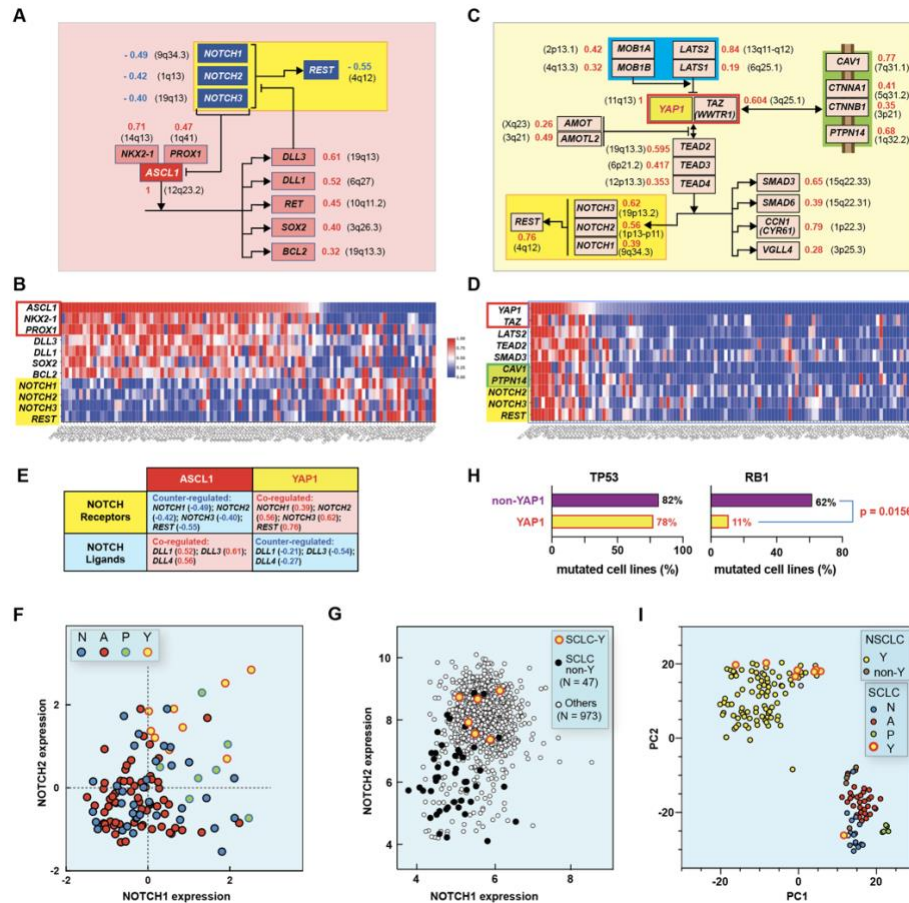

863  
864  
865  
866  
867  
868  
869  
870  
871  
872  
873  
874  
875  
876  
877  
878  
879  
880  
881  
882  
883  
884  
885  
886  
887  
888  
889

**Figure 5: Integration of the transcriptional networks of the neuroendocrine ASCL1 and non-neuroendocrine YAP1 SCLC cell lines with the NOTCH pathway**

(A-D). ASCL1 (panels A-B) and YAP1 (panels C-D) networks. Panel A shows the highly significant correlations between *ASCL1* expression and its molecular transcriptional coactivators *NKX2-1* and *PROX1*, and some of its downstream transcriptional targets (bayonet arrows). Numbers to the right indicate the significantly positive Pearson's correlations coefficients (red) and chromosome locations (black in parenthesis) obtained from Miner Global (<https://discover.nci.nih.gov/ScIcCellMinerCDB>). The NOTCH receptor network (blue boxes) with its transcriptional target *REST* are shown at the top of the panel (yellow box). Negatively significant Pearson's correlations coefficients (blue) and chromosome locations (black in parenthesis) obtained from SCLCcellMiner Global (<https://discover.nci.nih.gov/ScIcCellMinerCDB>) Panel B: visualization of the correlations between *ASCL1* expression and the indicated genes corresponding to those shown in panel A. Note the counter-expression of the NOTCH receptor pathway (yellow highlight) with respect to *ASCL1* expression. The image is a snapshot obtained using the multivariate analysis tool of SCLCcellMiner using the Global dataset of the 116 cell lines. Panels C and D. Same as panels A and B except for *YAP1* across the 116 SCLC cell lines of SCLCcellMiner. Note the positive correlation between *YAP1* expression and the NOTCH receptor pathway (see text for details). (E) Negative correlations between the NOTCH receptors and ligands and *ASCL1* vs *YAP1* across the 116 cell lines of SCLCcellMiner. Pearson's correlation coefficients with respect to *ASCL1* (2nd column) and *YAP1* (3rd column) are indicated in parenthesis. They can be obtained using the Global dataset of the 116 cell lines of SCLCcellMiner. (F) Correlation between *NOTCH1* and *NOTCH2* across the Global dataset of the 116 cell lines of SCLCcellMiner. *YAP1* cells show significantly highest expression of both *NOTCH1* and *NOTCH2*. (G). Correlation between *NOTCH1* and *NOTCH2* across the 1036 cell lines of the CCLE. The SCLC-YAP1 have highest NOTCH (see inset for annotations). (H) SCLC-YAP1 cells have significantly reduced frequency of RB1 mutations. Only one SCLC-YAP1 cell line (NCI-H196) shows RB1 mutation whereas 7 of the 9 SCLC-YAP1 show TP53 mutations. Data were compiled from the 116 cell lines of SCLC-CellMiner Global (I). tSNE clustering plot using gene expression data of 60 SCLC and 100 NSCLC cell lines (microarray; GDSC data source). Each dot represents a sample and each color represents the type of the sample (see inset).

890

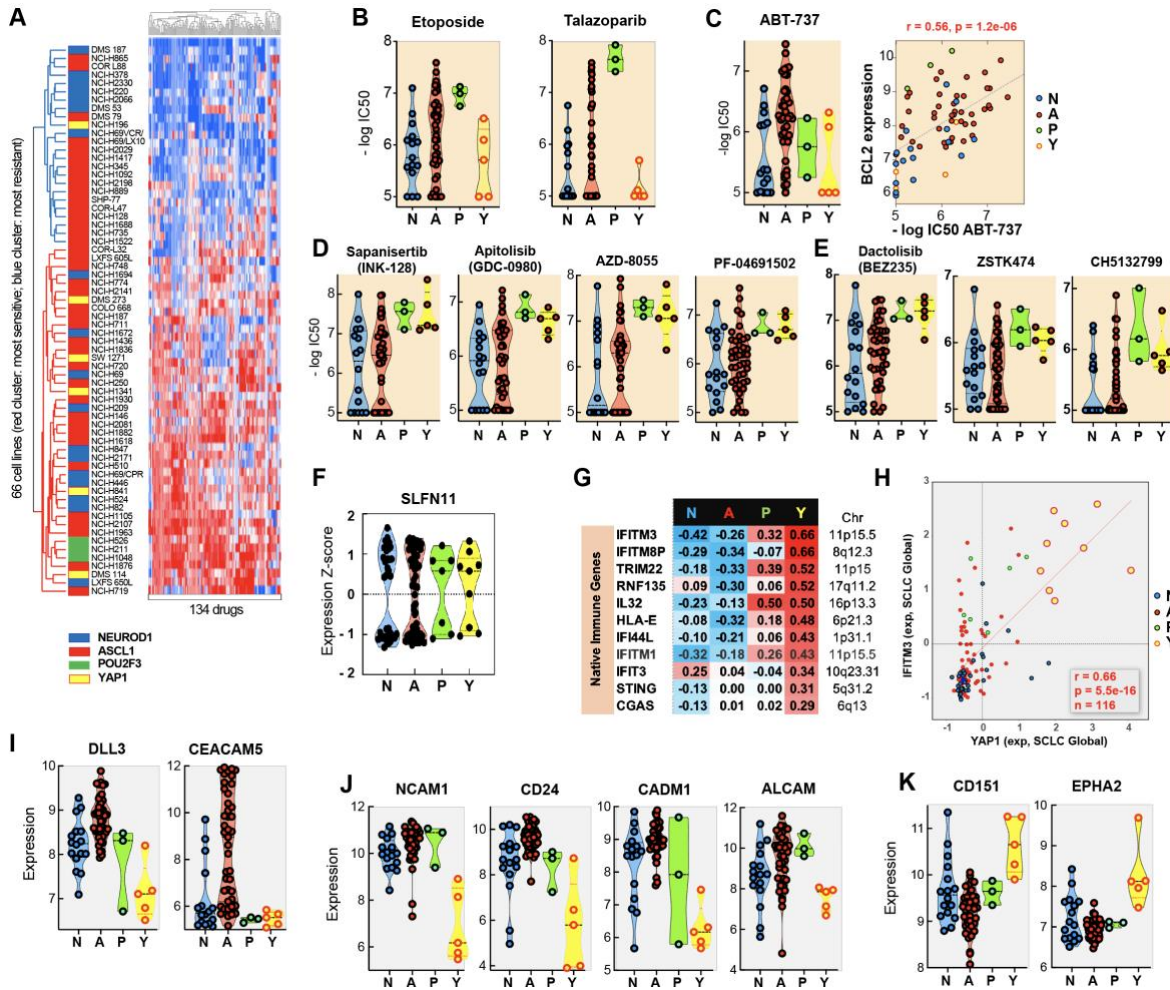

891

892

893

894

895

896

897

898

899

900

901

902

903

904

905

906

907

908

909

910

911

912

913

**Figure 6: Therapeutic predictive genomic biomarkers for SCLC based on cancer cell lines drug response, gene expression and molecular NPY classification**

(A). Cluster image map showing the global response of the NCI-SCLC cell lines (N = 66) across 134 different drugs from a broad range of chemical classes and targets. Cell lines are listed in the middle column and their NPY classification to the left. (B). POU2F3 cells are the most sensitive to etoposide and talazoparib while the YAP1 cell lines are the most resistant. (C). Selective activity of the BCL2-BCL-XL inhibitor in a subset of the ASCL1-SCLC cell lines (left) and highly significant correlation with BCL2 expression (right). (D). Selective activity of the mTOR/AKT inhibitors in a subset of the non-NE SCLC cell lines (POU2F3 = P; YAP1 = Y). (E). Selective activity of the PI3K inhibitors in the non-NE SCLC cell lines. (F). *SLFN11* expression across the 116 SCLC cell lines exhibits bimodal distribution in all 4 subtypes of SCLC and is a predictive biomarker for DNA damaging chemotherapeutic agents (<https://discover.nci.nih.gov/ScIcCellMinerCDB>) (see Supplemental Figure S12). (G). Selective expression of native immune pathway genes in the YAP1 SCLC (correlations between each of the NPY genes and the listed native immune response genes are listed with colors reflecting significantly positive and negative correlations (red and blue, respectively)). (H). Snapshot from SCLC-CellMiner illustrating the correlation between YAP1 and IFITM3 transcripts across the 116 cell lines of SCLC-CellMiner Global (see Supplemental Figure S13). (I). Selective expression of the DLL3 and CEACAM5 surface markers targeted by Rovalpituzimab tesirine (Rova-T) and Labetuzumab govitecan (IMMU-130), respectively, in the NE-SCLC cell lines (A preferentially) (see Supplemental Figure S13). (J). Potential surface biomarker targets for NE-SCLC and POU2F3 SCLC cells (N & A). (K). Potential surface biomarkers for non-NE YAP1-SCLC cells. Data in panels A-E and I-K are from the 66 cell lines from the NCI-DTP drug and genomic database.

914 **Material and methods**

915  
916 SCLC CellminerCDB is dedicated CellminerCDB version for SCLC cell lines (Reinhold et al.,  
917 2012; Reinhold et al., 2014; Reinhold et al., 2019; Reinhold et al., 2017b)  
918 <https://discover.nci.nih.gov/cellminerfdb/>).

919  
920 *SCLC-CellMinerCDB resources*

921 The cell line sets included in SCLC-CellMiner Cross-Data-Base (CDB) currently are from the  
922 National Cancer Institute SCLC cell lines from the Developmental Therapeutics Program Small  
923 Cell Lung Cancer Project (SCLC NCI-DTP), Cancer Cell Line Encyclopedia (CCLE), Genomics  
924 and Drug Sensitivity in Cancer (GDSC), Cancer Therapeutics Response Portal (CTRP), the  
925 University of Texas SouthWestern (UTSW) and a new merge resource Global expression SCLC  
926 (add help section SCLC CellMiner CDB URL address). The data source details are described in  
927 “Help” section of the SCLC CellMiner website.

928  
929 *SCLC-CellMinerCDB data*

930 Most of the data including drug activity and genomics experiments were processed at the institute  
931 of origin and were downloaded from their website or provided from their principal investigator.  
932 However, methylation, mutation and copy number data were processed at Development  
933 Therapeutics Branch, CCR, NCI to generate a gene level summary as described previously  
934 (Barretina et al., 2012; Garnett et al., 2012; McMillan et al., 2018; Polley et al., 2016).

935  
936 *DNA methylation data*

937 Gene-level methylation using the 850k Illumina Infinium MethylationEPIC BeadChip array was  
938 summarized based on (Reinhold et al., 2017b). In short, methylation data were normalized using  
939 the minfi package using default parameters, where probe-level beta-values and detection p-values  
940 were calculated for each probe. This provided 866,091 methylation probe measurements.  
941 Methylation probe beta-values for individual cell lines with detection p-values  $\geq 10^{-3}$  were set to  
942 missing. Also probes with median p-value  $\geq 10^{-6}$  were set to missing for all cells and removed  
943 from the analysis. Probe locations on the human genome (hg19 version) defined by Illumina was  
944 used for the analysis, annotating proximal gene transcripts and CpG islands. Probes were  
945 designated as category “1” or “2”, with category “1” considered to be most informative. Category  
946 “1” probes overlapped CpG islands and they overlapped either the TSS region within a 1.5kb  
947 distance, the first exon or 5'-UTR region. Additionally, probes on the upstream shore of a CpG  
948 island with a maximal distance of 200bp from the TSS were also included as category “1” probes.  
949 Category “2” probes were positioned either in the upstream- or downstream shore of a CpG island  
950 and overlapping the first exon, or on the downstream shore of CpG islands overlapping a 200bp  
951 region from the TSS, or in 5'-UTR. In case of genes with multiple transcript start sites, the  
952 transcript methylation with the most negative correlation to the gene level expression was used.  
953 The analysis resulted in gene-level methylation values for 23,202 genes.

954  
955 *Copy number*

956 Genome wide copy number for the cell lines was estimated from the methylation array data using  
957 the Chip Analysis Methylation Pipeline (*ChAMP*) (Tian et al., 2017) package. *ChAMP* returns lists  
958 of genomic segments with putative copy number estimates. However, the estimate is not valid for  
959 regions with high methylation detection p-values. For this reason, regions spanning more than 1kb  
960 with at least 5 probes with high detection p-values ( $p > 0.05$ ) were filtered out. The copy number

961 estimates were set to missing for those areas. Gene level copy number (for n=25,568 genes) was  
962 calculated for each gene individually, by calculating the average estimate between the transcription  
963 start sites and transcription end sites.

#### 964 965 *RNAseq data*

966 The RNA-seq gene expression data from UTSW SCLC were obtained from analyses based on  
967 (McMillan et al., 2018). The raw data have been previously submitted to dbGaP (accession  
968 phs001823.v1.p1). For CCLE, the RNA-seq data was downloaded from the broad institute portal  
969 at <https://portals.broadinstitute.org/ccle/data> (version 2016-06-17)

#### 970 971 *Global expression data*

972 We also generate a new Global SCLC dataset using all combined cell lines, averaging gene  
973 expression based on z-scored gene expression from all resources: NCI SCLC, CCLE, CTRP,  
974 GDSC and UTSW. For each experiment, genes were scaled across all cell lines to create a z-score  
975 normalized dataset. The data sources have a mixture of microarray and RNA-seq gene expression.  
976 To test for removal of batch effects by gene scaling (z-score normalization), principal component  
977 analysis (Partek Genomics suite v7.17.1222) was performed on the raw (Fig.S3A) and normalized  
978 data (Fig.S3B) for CCLE microarray and RNA-seq datasets.

#### 979 980 *Pathway level correlation of expression and DNA methylation*

981 The correlation between methylation and gene expression for multiple functional categories was  
982 calculated based on genes in Supplementary Table S4. For each category, the median correlation  
983 of the related genes was calculated to identify potential categories of interest.

#### 984 985 *Predictive power of DNA copy number and methylation on transcript expression.*

986 Testing the predictive power of DNA copy number and methylation on transcript expression was  
987 performed with linear regression analysis (as seen in Fig3G). For each of the 15,798 genes with all  
988 three forms of data available (transcript, methylation, and copy number levels) a linear regression  
989 model was fit, with both copy number and methylation as independent variables and transcript  
990 expression as the dependent variable. The model provided coefficients for the copy number and  
991 methylation that gave the lowest squared error between fitted values and true expression. We  
992 separated individual contributions of these two factors for gene expression prediction using the  
993 method of relative importance (Gromping, 2006), using the *lmg* method (Bacher, 1983) from the  
994 R package *relaimpo* to compute individual R<sup>2</sup> values. Total (or combined) R<sup>2</sup> is the summation of  
995 these two. Square roots of the R<sup>2</sup> values were multiplied by the sign of the coefficients of the factors  
996 in the combined model to get the value of R.

#### 997 998 *Cluster analysis*

999 The methylation heatmap was created with the *ComplexHeatmap* (Gu et al., 2016) R package  
1000 (version 1.20.0) using the *kmeans* clustering available in the *Heatmap()* function of the package.  
1001 The number of reported clusters was selected based on cluster stability and biological significance.

1002  
1003 SCLC cell lines groupings according NEUROD1, ASCL1, POU2F3 and YAP1 expression, MYC  
1004 genes expression and neuroendocrine status defined by the Gazdar classification (Zhang et al.,  
1005 2018) were done using the CIMminer tool from CellMiner  
1006 (<https://discover.nci.nih.gov/cimminer/oneMatrix.do>). The used parameters were Euclidean  
1007 distance method and complete linkage as cluster algorithm.

1008  
1009 SCLC and NSCLC cell line grouping was performed with the gene expression data from the GDSC  
1010 microarray dataset using the t-SNE algorithm in R (v3.5.1). The random seed was set to 1, the  
1011 Euclidean distance of genes was calculated with the *dist()* function with default settings. The t-  
1012 SNE grouping was calculated using the *Rtsne()* function from the Rtsne (van der Maaten, 2014)  
1013 package (v0.15) using the calculated distance matrix, with perplexity set to 10, and 5k maximum  
1014 iterations.

1015  
1016 The NCI SCLC drug activity heatmap was generated using Partek Software. First, drugs with  
1017 coefficient of variation less or equal to 0.09 were filtered out. Then the remaining data for the  
1018 selected 134 drugs (from originally 527) across the 66 SCLC lines were clustered using the  
1019 hierarchical method based on Euclidean distance and complete linkage.

1020  
1021 *Gene set enrichment analysis*  
1022 A preranked gene set enrichment analysis was run in R using the *clusterProfiler* (Yu et al., 2012)  
1023 and *ReactomePA* (Yu and He, 2016) packages. Pathways with an adjusted p-value below 0.05 were  
1024 considered as significantly enriched. Single sample gene set enrichment score (APM score) was  
1025 computed using the R package GSEA (version 1.28.0).

1026  
1027 *Statistical methods.*  
1028 Correlations, heatmaps, and histograms were generated mostly using The R Project for Statistical  
1029 Computing. Some plots and analysis (such as the Kruskal Willis test) were generated using Partek  
1030 Genomics suite v7.17.1222 (<https://www.partek.com/partek-genomics-suite/>) or using SCLC  
1031 CellMinerCDB and CellMinerCDB (<http://discover.nci.nih.gov/cellminerfdb>).  
1032 Wilcoxon rank-sum tests were used to test the difference between continuous variables such as  
1033 drug sensitivity and gene expression according NAPY classification. We considered changes  
1034 significant if p-values were below 0.05. In the figures, p-values below 0.00005 were summarized  
1035 with four asterisks, p-values below 0.0005 were summarized with three asterisks, p-values below  
1036 0.005 were summarized with two asterisks and p-values below 0.05 were summarized with one  
1037 asterisk.

1038  
1039 **Data availability**  
1040 All newly generated datasets have been deposited to the Gene Expression Omnibus (GEO,  
1041 <https://www.ncbi.nlm.nih.gov/geo/>) under the accession number **GSE145156**.

1042  
1043 **Data for reviewers**  
1044 Data can be accessed at <https://www.ncbi.nlm.nih.gov/geo/query/acc.cgi?acc=GSE145156> using  
1045 the reviewer token “wnyxcukabfgnhet”.

1046 **References**

- 1047
- 1048 Andersson, E.R., Sandberg, R., and Lendahl, U. (2011). Notch signaling: simplicity in design,  
1049 versatility in function. *Development* 138, 3593-3612.
- 1050 Augustyn, A., Borromeo, M., Wang, T., Fujimoto, J., Shao, C., Dospoy, P.D., Lee, V., Tan, C.,  
1051 Sullivan, J.P., Larsen, J.E., *et al.* (2014). ASCL1 is a lineage oncogene providing therapeutic  
1052 targets for high-grade neuroendocrine lung cancers. *Proceedings of the National Academy of*  
1053 *Sciences of the United States of America* 111, 14788-14793.
- 1054 Bacher, F. (1983). Introduction to Bivariate and Multivariate-Analysis - Lindman,Rh,  
1055 Merenda,Pf, Gold,Rz. *Ann Psychol* 83, 265-266.
- 1056 Barretina, J., Caponigro, G., Stransky, N., Venkatesan, K., Margolin, A.A., Kim, S., Wilson, C.J.,  
1057 Lehar, J., Kryukov, G.V., Sonkin, D., *et al.* (2012). The Cancer Cell Line Encyclopedia enables  
1058 predictive modelling of anticancer drug sensitivity. *Nature* 483, 603-307.
- 1059 Bastide, A., and David, A. (2018). The ribosome, (slow) beating heart of cancer (stem) cell.  
1060 *Oncogenesis* 7, 34.
- 1061 Borges, M., Linnoila, R.I., van de Velde, H.J., Chen, H., Nelkin, B.D., Mabry, M., Baylin, S.B.,  
1062 and Ball, D.W. (1997). An achaete-scute homologue essential for neuroendocrine differentiation  
1063 in the lung. *Nature* 386, 852-855.
- 1064 Buschbeck, M., and Hake, S.B. (2017). Variants of core histones and their roles in cell fate  
1065 decisions, development and cancer. *Nat Rev Mol Cell Biol* 18, 299-314.
- 1066 Cancer Genome Atlas Research, N. (2012). Comprehensive genomic characterization of  
1067 squamous cell lung cancers. *Nature* 489, 519-525.
- 1068 Cancer Genome Atlas Research, N. (2014). Comprehensive molecular profiling of lung  
1069 adenocarcinoma. *Nature* 511, 543-550.
- 1070 Carney, D.N., Gazdar, A.F., Bepler, G., Guccion, J.G., Marangos, P.J., Moody, T.W., Zweig,  
1071 M.H., and Minna, J.D. (1985). Establishment and identification of small cell lung cancer cell  
1072 lines having classic and variant features. *Cancer Research* 45, 2913-2923.
- 1073 Coats, S., Williams, M., Kebble, B., Dixit, R., Tseng, L., Yao, N.S., Tice, D.A., and Soria, J.C.  
1074 (2019). Antibody-Drug Conjugates: Future Directions in Clinical and Translational Strategies to  
1075 Improve the Therapeutic Index. *Clin Cancer Res* 25, 5441-5448.
- 1076 Crawford, J.J., Bronner, S.M., and Zbieg, J.R. (2018). Hippo pathway inhibition by blocking the  
1077 YAP/TAZ-TEAD interface: a patent review. *Expert Opin Ther Pat* 28, 867-873.
- 1078 Dammert, M.A., Bragelmann, J., Olsen, R.R., Bohm, S., Monhasery, N., Whitney, C.P.,  
1079 Chalishazar, M.D., Tumbrink, H.L., Guthrie, M.R., Klein, S., *et al.* (2019). MYC paralog-  
1080 dependent apoptotic priming orchestrates a spectrum of vulnerabilities in small cell lung cancer.  
1081 *Nat Commun* 10, 3485.
- 1082 Das, M. (2017). Labetuzumab govitecan in metastatic colorectal cancer. *Lancet Oncol* 18, e563.
- 1083 Dasgupta, I., and McCollum, D. (2019). Control of cellular responses to mechanical cues through  
1084 YAP/TAZ regulation. *J Biol Chem* 294, 17693-17706.
- 1085 Farago, A.F., Yeap, B.Y., Stanzione, M., Hung, Y.P., Heist, R.S., Marcoux, J.P., Zhong, J.,  
1086 Rangachari, D., Barbie, D.A., Phat, S., *et al.* (2019). Combination Olaparib and Temozolomide in  
1087 Relapsed Small Cell Lung Cancer. *Cancer Discov.*
- 1088 Gardner, E.E., Lok, B.H., Schneeberger, V.E., Desmeules, P., Miles, L.A., Arnold, P.K., Ni, A.,  
1089 Khodos, I., de Stanchina, E., Nguyen, T., *et al.* (2017). Chemosensitive Relapse in Small Cell  
1090 Lung Cancer Proceeds through an EZH2-SLFN11 Axis. *Cancer Cell* 31, 286-299.

1091 Garnett, M.J., Edelman, E.J., Heidorn, S.J., Greenman, C.D., Dastur, A., Lau, K.W., Greninger,  
1092 P., Thompson, I.R., Luo, X., Soares, J., *et al.* (2012). Systematic identification of genomic  
1093 markers of drug sensitivity in cancer cells. *Nature* 483, 570-575.  
1094 Gazdar, A.F., Bunn, P.A., and Minna, J.D. (2017). Small-cell lung cancer: what we know, what  
1095 we need to know and the path forward. *Nat Rev Cancer* 17, 725-737.  
1096 Gazdar, A.F., Carney, D.N., Nau, M.M., and Minna, J.D. (1985). Characterization of variant  
1097 subclasses of cell lines derived from small cell lung cancer having distinctive biochemical,  
1098 morphological, and growth properties. *Cancer Res* 45, 2924-2930.  
1099 Gazdar, A.F., Girard, L., Lockwood, W.W., Lam, W.L., and Minna, J.D. (2010). Lung cancer cell  
1100 lines as tools for biomedical discovery and research. *J Natl Cancer Inst* 102, 1310-1321.  
1101 Gazdar, A.F., Kadoyama, C., Venzon, D., Park, J.G., Tsai, C.M., Linnoila, R.I., Mulshine, J.L.,  
1102 Ihde, D.C., and Giaccone, G. (1992). Association between histological type and neuroendocrine  
1103 differentiation on drug sensitivity of lung cancer cell lines. *J Natl Cancer Inst Monogr*, 191-196.  
1104 George, J., Lim, J.S., Jang, S.J., Cun, Y., Ozretic, L., Kong, G., Leenders, F., Lu, X., Fernandez-  
1105 Cuesta, L., Bosco, G., *et al.* (2015). Comprehensive genomic profiles of small cell lung cancer.  
1106 *Nature* 524, 47-53.  
1107 Gillet, J.P., Varma, S., and Gottesman, M.M. (2013). The clinical relevance of cancer cell lines. *J*  
1108 *Natl Cancer Inst* 105, 452-458.  
1109 Gromping, U. (2006). Relative importance for linear regression in R: The package relaimpo. *J*  
1110 *Stat Softw* 17.  
1111 Gu, Z., Eils, R., and Schlesner, M. (2016). Complex heatmaps reveal patterns and correlations in  
1112 multidimensional genomic data. *Bioinformatics* 32, 2847-2849.  
1113 Guinee, D.G., Jr., Fishback, N.F., Koss, M.N., Abbondanzo, S.L., and Travis, W.D. (1994). The  
1114 spectrum of immunohistochemical staining of small-cell lung carcinoma in specimens from  
1115 transbronchial and open-lung biopsies. *Am J Clin Pathol* 102, 406-414.  
1116 Hann, C.L., Wu, M.A., Rehkhtman, N., and Rudin, C.M. (2019). Small Cell and Neuroendocrine  
1117 Tumors of the Lung. In *Cancer Principles & Practice of Oncology*, V.T. De Vita, T.S. Lawrence,  
1118 and S.A. Rosenbergt, eds. (Philadelphia: Wolters Kluwer), pp. 671-700.  
1119 Huang, Y.H., Klingbeil, O., He, X.Y., Wu, X.S., Arun, G., Lu, B., Somerville, T.D.D., Milazzo,  
1120 J.P., Wilkinson, J.E., Demerdash, O.E., *et al.* (2018). POU2F3 is a master regulator of a tuft cell-  
1121 like variant of small cell lung cancer. *Genes Dev* 32, 915-928.  
1122 Ito, T., Udaka, N., Yazawa, T., Okudela, K., Hayashi, H., Sudo, T., Guillemot, F., Kageyama, R.,  
1123 and Kitamura, H. (2000). Basic helix-loop-helix transcription factors regulate the neuroendocrine  
1124 differentiation of fetal mouse pulmonary epithelium. *Development* 127, 3913-3921.  
1125 Johnson, B.E., Ihde, D.C., Makuch, R.W., Gazdar, A.F., Carney, D.N., Oie, H., Russell, E., Nau,  
1126 M.M., and Minna, J.D. (1987). *myc* family oncogene amplification in tumor cell lines established  
1127 from small cell lung cancer patients and its relationship to clinical status and course. *J Clin Invest*  
1128 79, 1629-1634.  
1129 Kalari, S., Jung, M., Kernstine, K.H., Takahashi, T., and Pfeifer, G.P. (2013). The DNA  
1130 methylation landscape of small cell lung cancer suggests a differentiation defect of  
1131 neuroendocrine cells. *Oncogene* 32, 3559-3568.  
1132 Kim, J., Sturgill, D., Sebastian, R., Khurana, S., Tran, A.D., Edwards, G.B., Kruswick, A.,  
1133 Burkett, S., Hosogane, E.K., Hannon, W.W., *et al.* (2018). Replication Stress Shapes a Protective  
1134 Chromatin Environment across Fragile Genomic Regions. *Mol Cell* 69, 36-47 e37.  
1135 Kohn, K.W., Aladjem, M.I., Weinstein, J.N., and Pommier, Y. (2006). Molecular interaction  
1136 maps of bioregulatory networks: a general rubric for systems biology. *Mol Biol Cell* 17, 1-13.

1137 Kohn, K.W., Zeeberg, B.M., Reinhold, W.C., and Pommier, Y. (2014). Gene expression  
1138 correlations in human cancer cell lines define molecular interaction networks for epithelial  
1139 phenotype. *PLoS one* 9, e99269.

1140 Leonetti, A., Facchinetti, F., Minari, R., Cortellini, A., Rolfo, C.D., Giovannetti, E., and Tiseo,  
1141 M. (2019). Notch pathway in small-cell lung cancer: from preclinical evidence to therapeutic  
1142 challenges. *Cell Oncol (Dordr)* 42, 261-273.

1143 Ma, S., Meng, Z., Chen, R., and Guan, K.L. (2019). The Hippo Pathway: Biology and  
1144 Pathophysiology. *Annu Rev Biochem* 88, 577-604.

1145 Marx, V. (2014). Models: stretching the skills of cell lines and mice. *Nat Methods* 11, 617-620.

1146 McColl, K., Wildey, G., Sakre, N., Lipka, M.B., Behtaj, M., Kresak, A., Chen, Y., Yang, M.,  
1147 Velcheti, V., Fu, P., *et al.* (2017). Reciprocal expression of INSM1 and YAP1 defines subgroups  
1148 in small cell lung cancer. *Oncotarget* 8, 73745-73756.

1149 McMillan, E.A., Ryu, M.J., Diep, C.H., Mendiratta, S., Clemenceau, J.R., Vaden, R.M., Kim,  
1150 J.H., Motoyaji, T., Covington, K.R., Peyton, M., *et al.* (2018). Chemistry-First Approach for  
1151 Nomination of Personalized Treatment in Lung Cancer. *Cell* 173, 864-878 e829.

1152 Morgensztern, D., Besse, B., Greillier, L., Santana-Davila, R., Ready, N., Hann, C.L., Glisson,  
1153 B.S., Farago, A.F., Dowlati, A., Rudin, C.M., *et al.* (2019). Efficacy and Safety of  
1154 Rovalpituzumab Tesirine in Third-Line and Beyond Patients with DLL3-Expressing,  
1155 Relapsed/Refractory Small-Cell Lung Cancer: Results From the Phase II TRINITY Study. *Clin*  
1156 *Cancer Res* 25, 6958-6966.

1157 Murai, J., Thomas, A., Miettinen, M., and Pommier, Y. (2019). Schlafen 11 (SLFN11), a  
1158 restriction factor for replicative stress induced by DNA-targeting anti-cancer therapies.  
1159 *Pharmacol Ther* 201, 94-102.

1160 Nau, M.M., Brooks, B.J., Battey, J., Sausville, E., Gazdar, A.F., Kirsch, I.R., McBride, O.W.,  
1161 Bertness, V., Hollis, G.F., and Minna, J.D. (1985). L-myc, a new myc-related gene amplified and  
1162 expressed in human small cell lung cancer. *Nature* 318, 69-73.

1163 Neptune, E.R., Podowski, M., Calvi, C., Cho, J.H., Garcia, J.G., Tuder, R., Linnoila, R.I., Tsai,  
1164 M.J., and Dietz, H.C. (2008). Targeted disruption of NeuroD, a proneural basic helix-loop-helix  
1165 factor, impairs distal lung formation and neuroendocrine morphology in the neonatal lung. *J Biol*  
1166 *Chem* 283, 21160-21169.

1167 Neve, R.M., Chin, K., Fridlyand, J., Yeh, J., Baehner, F.L., Fevr, T., Clark, L., Bayani, N.,  
1168 Coppe, J.P., Tong, F., *et al.* (2006). A collection of breast cancer cell lines for the study of  
1169 functionally distinct cancer subtypes. *Cancer Cell* 10, 515-527.

1170 Ouadah, Y., Rojas, E.R., Riordan, D.P., Capostagno, S., Kuo, C.S., and Krasnow, M.A. (2019).  
1171 Rare Pulmonary Neuroendocrine Cells Are Stem Cells Regulated by Rb, p53, and Notch. *Cell*  
1172 *179*, 403-416 e423.

1173 Pietanza, M.C., Waqar, S.N., Krug, L.M., Dowlati, A., Hann, C.L., Chiappori, A., Owonikoko,  
1174 T.K., Woo, K.M., Cardnell, R.J., Fujimoto, J., *et al.* (2018). Randomized, Double-Blind, Phase II  
1175 Study of Temozolomide in Combination With Either Veliparib or Placebo in Patients With  
1176 Relapsed-Sensitive or Refractory Small-Cell Lung Cancer. *J Clin Oncol* 36, 2386-2394.

1177 Poirier, J.T., Gardner, E.E., Connis, N., Moreira, A.L., de Stanchina, E., Hann, C.L., and Rudin,  
1178 C.M. (2015). DNA methylation in small cell lung cancer defines distinct disease subtypes and  
1179 correlates with high expression of EZH2. *Oncogene* 34, 5869-5878.

1180 Polley, E., Kunkel, M., Evans, D., Silvers, T., Delosh, R., Laudeman, J., Ogle, C., Reinhart, R.,  
1181 Selby, M., Connelly, J., *et al.* (2016). Small Cell Lung Cancer Screen of Oncology Drugs,  
1182 Investigational Agents, and Gene and microRNA Expression. *J Natl Cancer Inst* 108.



1183 Rajapakse, V.N., Luna, A., Yamade, M., Loman, L., Varma, S., Sunshine, M., Iorio, F., Sousa,  
1184 F.G., Elloumi, F., Aladjem, M.I., *et al.* (2018). CellMinerCDB for Integrative Cross-Database  
1185 Genomics and Pharmacogenomics Analyses of Cancer Cell Lines. *iScience* *10*, 247-264.  
1186 Reinhold, W.C., Sunshine, M., Liu, H., Varma, S., Kohn, K.W., Morris, J., Doroshow, J., and  
1187 Pommier, Y. (2012). CellMiner: a web-based suite of genomic and pharmacologic tools to  
1188 explore transcript and drug patterns in the NCI-60 cell line set. *Cancer Res* *72*, 3499-3511.  
1189 Reinhold, W.C., Thomas, A., and Pommier, Y. (2017a). DNA-Targeted Precision Medicine;  
1190 Have We Been Caught Sleeping? *Trends in Cancer* *3*, 2-6.  
1191 Reinhold, W.C., Varma, S., Sousa, F., Sunshine, M., Abaan, O.D., Davis, S.R., Reinhold, S.W.,  
1192 Kohn, K.W., Morris, J., Meltzer, P.S., *et al.* (2014). NCI-60 whole exome sequencing and  
1193 pharmacological CellMiner analyses. *PloS one* *9*, e101670.  
1194 Reinhold, W.C., Varma, S., Sunshine, M., Elloumi, F., Ofori-Atta, K., Lee, S., Trepel, J.B.,  
1195 Meltzer, P.S., Doroshow, J.H., and Pommier, Y. (2019). RNA Sequencing of the NCI-60:  
1196 Integration into CellMiner and CellMiner CDB. *Cancer Res* *79*, 3514-3524.  
1197 Reinhold, W.C., Varma, S., Sunshine, M., Rajapakse, V., Luna, A., Kohn, K.W., Stevenson, H.,  
1198 Wang, Y., Heyn, H., Nogales, V., *et al.* (2017b). The NCI-60 Methylome and Its Integration into  
1199 CellMiner. *Cancer Res* *77*, 601-612.  
1200 Reinhold, W.C., Varma, S., Sunshine, M., Rajapakse, V., Luna, A., Kohn, K.W., Stevenson, H.,  
1201 Wang, Y., Heyn, H., Nogales, V., *et al.* (2017c). The NCI-60 Methylome and Its Integration into  
1202 CellMiner. *Cancer Research* *77*, 601-612.  
1203 Rudin, C.M., Hann, C.L., Garon, E.B., Ribeiro de Oliveira, M., Bonomi, P.D., Camidge, D.R.,  
1204 Chu, Q., Giaccone, G., Khaira, D., Ramalingam, S.S., *et al.* (2012). Phase II study of single-agent  
1205 navitoclax (ABT-263) and biomarker correlates in patients with relapsed small cell lung cancer.  
1206 *Clin Cancer Res* *18*, 3163-3169.  
1207 Rudin, C.M., Pietanza, M.C., Bauer, T.M., Ready, N., Morgensztern, D., Glisson, B.S., Byers,  
1208 L.A., Johnson, M.L., Burris, H.A., 3rd, Robert, F., *et al.* (2017). Rovalpituzumab tesirine, a  
1209 DLL3-targeted antibody-drug conjugate, in recurrent small-cell lung cancer: a first-in-human,  
1210 first-in-class, open-label, phase 1 study. *Lancet Oncol* *18*, 42-51.  
1211 Rudin, C.M., Poirier, J.T., Byers, L.A., Dive, C., Dowlati, A., George, J., Heymach, J.V.,  
1212 Johnson, J.E., Lehman, J.M., MacPherson, D., *et al.* (2019). Molecular subtypes of small cell  
1213 lung cancer: a synthesis of human and mouse model data. *Nat Rev Cancer* *19*, 289-297.  
1214 Sato, G. (2008). Tissue culture: the unrealized potential. *Cytotechnology* *57*, 111-114.  
1215 Sulima, S.O., Hofman, I.J.F., De Keersmaecker, K., and Dinman, J.D. (2017). How Ribosomes  
1216 Translate Cancer. *Cancer Discov* *7*, 1069-1087.  
1217 Tarhini, A., Kotsakis, A., Gooding, W., Shuai, Y., Petro, D., Friedland, D., Belani, C.P., Dacic,  
1218 S., and Argiris, A. (2010). Phase II study of everolimus (RAD001) in previously treated small  
1219 cell lung cancer. *Clin Cancer Res* *16*, 5900-5907.  
1220 Thomas, A., and Pommier, Y. (2016). Small cell lung cancer: Time to revisit DNA-damaging  
1221 chemotherapy. *Sci Transl Med* *8*, 346fs312.  
1222 Thomas, A., Tanaka, M., Trepel, J., Reinhold, W.C., Rajapakse, V.N., and Pommier, Y. (2017).  
1223 Temozolomide in the Era of Precision Medicine. *Cancer Res* *77*, 823-826.  
1224 Tian, Y., Morris, T.J., Webster, A.P., Yang, Z., Beck, S., Feber, A., and Teschendorff, A.E.  
1225 (2017). ChAMP: updated methylation analysis pipeline for Illumina BeadChips. *Bioinformatics*  
1226 *33*, 3982-3984.  
1227 Totaro, A., Panciera, T., and Piccolo, S. (2018). YAP/TAZ upstream signals and downstream  
1228 responses. *Nat Cell Biol* *20*, 888-899.

1229 van der Maaten, L. (2014). Accelerating t-SNE using Tree-Based Algorithms. *J Mach Learn Res*  
1230 *15*, 3221-3245.

1231 Wang, H., Huang, S., Shou, J., Su, E.W., Onyia, J.E., Liao, B., and Li, S. (2006). Comparative  
1232 analysis and integrative classification of NCI60 cell lines and primary tumors using gene  
1233 expression profiling data. *BMC Genomics* *7*, 166.

1234 Wang, S., He, Z., Wang, X., Li, H., and Liu, X.-S. (2019). Antigen presentation and tumor  
1235 immunogenicity in cancer immunotherapy response prediction. *eLife* *8*, e49020.

1236 Wang, S., Tang, J., Sun, T., Zheng, X., Li, J., Sun, H., Zhou, X., Zhou, C., Zhang, H., Cheng, Z.,  
1237 *et al.* (2017). Survival changes in patients with small cell lung cancer and disparities between  
1238 different sexes, socioeconomic statuses and ages. *Sci Rep* *7*, 1339.

1239 Weinstein, J.N. (2012). Drug discovery: Cell lines battle cancer. *Nature* *483*, 544-545.

1240 Wistuba, II, Bryant, D., Behrens, C., Milchgrub, S., Virmani, A.K., Ashfaq, R., Minna, J.D., and  
1241 Gazdar, A.F. (1999). Comparison of features of human lung cancer cell lines and their  
1242 corresponding tumors. *Clin Cancer Res* *5*, 991-1000.

1243 Wooten, D.J., Groves, S.M., Tyson, D.R., Liu, Q., Lim, J.S., Albert, R., Lopez, C.F., Sage, J.,  
1244 and Quaranta, V. (2019). Systems-level network modeling of Small Cell Lung Cancer subtypes  
1245 identifies master regulators and destabilizers. *PLoS Comput Biol* *15*, e1007343.

1246 Yimlamai, D., Christodoulou, C., Galli, G.G., Yanger, K., Pepe-Mooney, B., Gurung, B.,  
1247 Shrestha, K., Cahan, P., Stanger, B.Z., and Camargo, F.D. (2014). Hippo pathway activity  
1248 influences liver cell fate. *Cell* *157*, 1324-1338.

1249 Yu, G., and He, Q.Y. (2016). ReactomePA: an R/Bioconductor package for reactome pathway  
1250 analysis and visualization. *Mol Biosyst* *12*, 477-479.

1251 Yu, G., Wang, L.G., Han, Y., and He, Q.Y. (2012). clusterProfiler: an R package for comparing  
1252 biological themes among gene clusters. *OMICS* *16*, 284-287.

1253 Zhang, W., Girard, L., Zhang, Y.A., Haruki, T., Papari-Zareei, M., Stastny, V., Ghayee, H.K.,  
1254 Pacak, K., Oliver, T.G., Minna, J.D., *et al.* (2018). Small cell lung cancer tumors and preclinical  
1255 models display heterogeneity of neuroendocrine phenotypes. *Transl Lung Cancer Res* *7*, 32-49.

1256 Zoppoli, G., Regairaz, M., Leo, E., Reinhold, W.C., Varma, S., Ballestrero, A., Doroshov, J.H.,  
1257 and Pommier, Y. (2012). Putative DNA/RNA helicase Schlafen-11 (SLFN11) sensitizes cancer  
1258 cells to DNA-damaging agents. *Proceedings of the National Academy of Sciences of the United*  
1259 *States of America* *109*, 15030-15035.

1260

1261

1262
